# Supplementary material for: Early urine proteome changes in the Walker-256 tail-vein injection rat model
Source: PubMed Central journal article supplement (PMC6760176; doi:10.1038/s41598-019-50301-1), 2019-09-24
Supplement: 41598_2019_50301_MOESM1_ESM.pdf [file 41598_2019_50301_MOESM1_ESM.pdf]

## **Supplementary Information**

### **Early urine proteome changes in the Walker-256 tail-vein injection rat model**

Jing Wei<sup>1</sup>, Na Ni<sup>2</sup>, Wenshu Meng<sup>1</sup> & Youhe Gao<sup>1\*</sup>

<sup>1</sup>Department of Biochemistry and Molecular Biology, Beijing Normal University, Gene Engineering Drug and Biotechnology Beijing Key Laboratory, Beijing, 100875, China

<sup>2</sup>Department of Biochemistry and Molecular Biology, College of Basic Medicine, Chongqing Medical University, Chongqing, 400016, China

\*Corresponding author: Youhe Gao

Email: [gaoyouhe@bnu.edu.cn](mailto:gaoyouhe@bnu.edu.cn)

Phone: 86-10-5880-4382; Fax: 86-10-6521-2284

**Supplementary Figure S1.** The CV values of 106 PRM-targeted peptides.

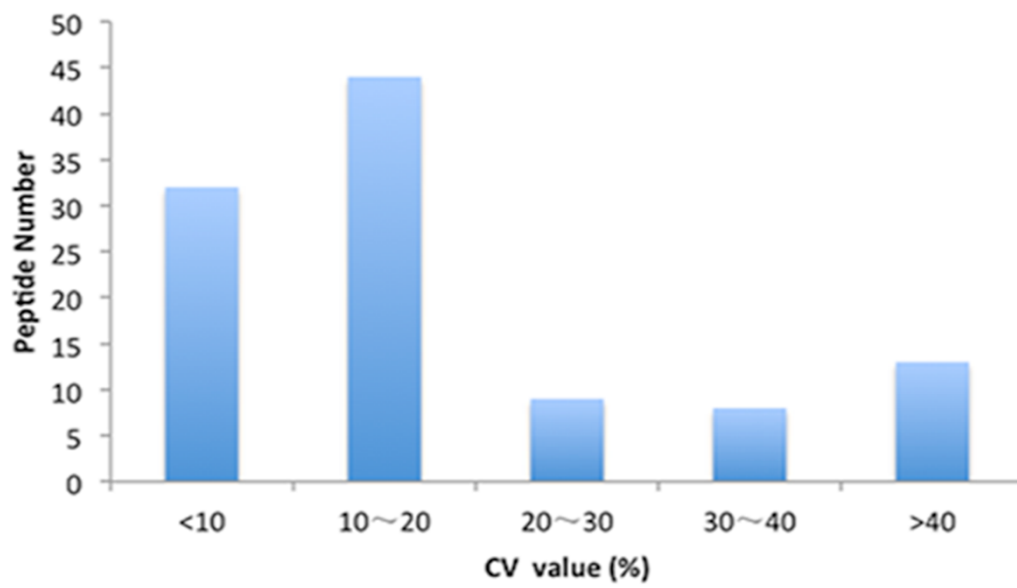

**Supplementary Figure S2.** Overlap of differential proteins identified in different stages in 7 Walker-256 tail-vein injection rats.

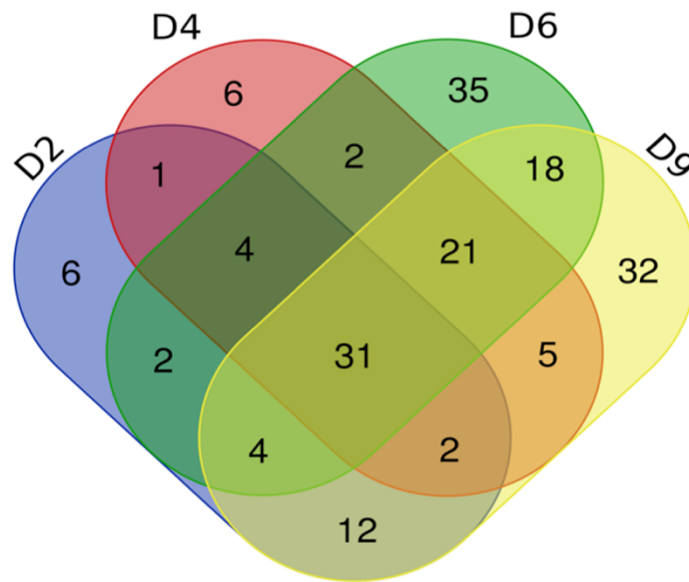

**Supplementary Figure S3.** STRING protein-protein interaction (PPI) network analysis of twenty proteins associated with immune system.

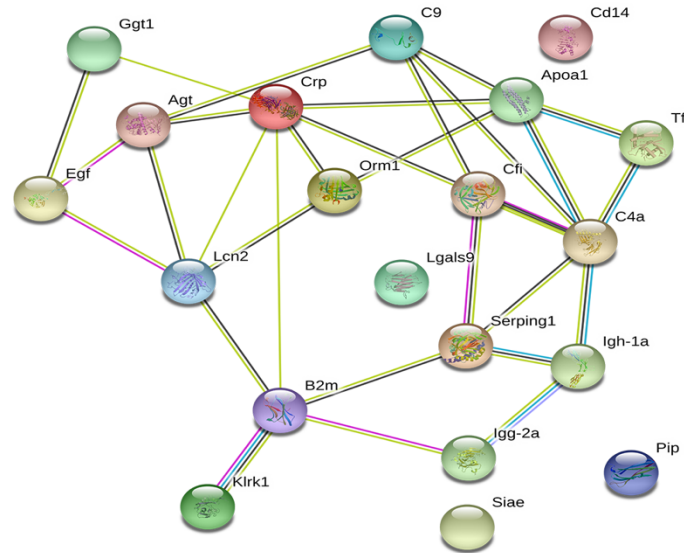

**Supplementary Figure S4.** Comparison of differential urinary proteins between Walker-256 tail-vein injection rats and the subcutaneous rats.

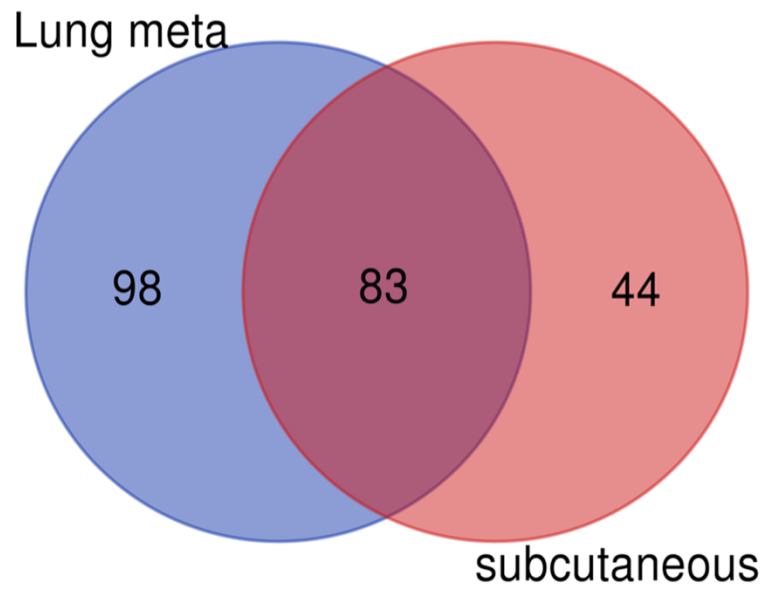

**Supplementary Table S1.** Retention time of 20 differential proteins with 106 peptides used for PRM validation.

| m/z        | z | Peptide Modified Sequence           | Protein Name        | t start (min) | t stop (min) | name |
|------------|---|-------------------------------------|---------------------|---------------|--------------|------|
| 530.772719 | 2 | LVNGASASEGR                         | sp O70513 LG3BP_RAT | 15.44         | 19.44        |      |
| 696.029846 | 3 | TNPEAQALWQVVGSSVIMR                 | sp O70513 LG3BP_RAT | 76.03         | 80.03        |      |
| 588.281008 | 2 | VDAEC[+57]MPVVR                     | sp O70513 LG3BP_RAT | 30.31         | 34.31        |      |
| 568.310623 | 2 | RIEVSMSVSK                          | sp O70513 LG3BP_RAT | 16.45         | 20.45        |      |
| 858.904136 | 2 | LASAYGATELQGYC[+57]GR               | sp O70513 LG3BP_RAT | 40.92         | 44.92        |      |
| 702.385039 | 2 | SELAVSSELDLLK                       | sp O70513 LG3BP_RAT | 70.27         | 74.27        |      |
| 834.860883 | 2 | C[+57]ISFDSTGFC[+57]YVGR            | sp P83121 UP3_RAT   | 68.24         | 72.24        |      |
| 783.376917 | 3 | HIC[+57]QTYPDEIC[+57]AWVVVTTR       | sp P83121 UP3_RAT   | 87.44         | 91.44        |      |
| 744.68234  | 3 | AISYC[+57]HETMTGWVHDLGR             | sp P80067 CATC_RAT  | 73.57         | 77.57        |      |
| 491.234187 | 2 | NWAC[+57]FVGGK                      | sp P80067 CATC_RAT  | 46.58         | 50.58        |      |
| 763.919915 | 2 | VYVNV AHLGGLQEK                     | sp P80067 CATC_RAT  | 53.13         | 57.13        |      |
| 969.77032  | 3 | YAQDFGVVEENC[+57]FPYTATDAPC[+57]KPK | sp P80067 CATC_RAT  | 70.32         | 74.32        |      |
| 703.371735 | 2 | DPVTGLDYWIVK                        | sp P80067 CATC_RAT  | 88.55         | 92.55        |      |
| 993.997376 | 2 | GTDEC[+57]AIESIAMAAIPIPK            | sp P80067 CATC_RAT  | 93.49         | 97.49        |      |
| 499.770602 | 2 | VEPGMAPVAK                          | sp Q63041 A1M_RAT   | 23.66         | 27.66        |      |
| 703.869359 | 2 | AEQGAYLGPLPYK                       | sp Q63041 A1M_RAT   | 44.30         | 48.30        |      |
| 527.318774 | 2 | VAEVPALVQK                          | sp Q63041 A1M_RAT   | 26.90         | 30.90        |      |
| 602.832245 | 2 | LADLPGNYITK                         | sp Q63041 A1M_RAT   | 41.09         | 45.09        |      |
| 580.819138 | 2 | VNTLPLNFDK                          | sp Q63041 A1M_RAT   | 44.50         | 48.50        |      |
| 551.285994 | 2 | LQDQSNIQR                           | sp Q63041 A1M_RAT   | 9.23          | 13.23        |      |
| 487.24614  | 2 | GYELAHQR                            | sp P07314 GGT1_RAT  | 9.83          | 13.83        |      |

|            |   |                            |                     |       |       |
|------------|---|----------------------------|---------------------|-------|-------|
| 586.842947 | 2 | LFQPSIQLAR                 | sp P07314 GGT1_RAT  | 52.47 | 56.47 |
| 626.794283 | 2 | TPALC[+57]EVFC[+57]R       | sp P07314 GGT1_RAT  | 48.57 | 52.57 |
| 749.914829 | 2 | LADTLQILAQEGAR             | sp P07314 GGT1_RAT  | 61.94 | 65.94 |
| 531.800748 | 2 | FVDVSQVIR                  | sp P07314 GGT1_RAT  | 46.83 | 50.83 |
| 579.32987  | 2 | NIDQVVTAGLK                | sp P07314 GGT1_RAT  | 40.99 | 44.99 |
| 800.396666 | 2 | ELEEQLGPVAEETR             | sp P02650 APOE_RAT  | 39.08 | 43.08 |
| 484.779816 | 2 | LGPLVEQGR                  | sp P02650 APOE_RAT  | 20.14 | 24.14 |
| 620.343843 | 2 | TANLGAGAAQPLR              | sp P02650 APOE_RAT  | 24.40 | 28.40 |
| 689.343183 | 2 | SKMEEQTQQIR                | sp P02650 APOE_RAT  | 35.95 | 39.95 |
| 581.779687 | 2 | MEEQTQQIR                  | sp P02650 APOE_RAT  | 11.71 | 15.71 |
| 538.298373 | 2 | LQAEIFQAR                  | sp P02650 APOE_RAT  | 32.52 | 36.52 |
| 541.768591 | 2 | DGYMLTLNR                  | sp Q9QX79 FETUB_RAT | 46.78 | 50.78 |
| 419.232502 | 2 | SPGVPPQR                   | sp Q9QX79 FETUB_RAT | 12.73 | 16.73 |
| 485.310221 | 2 | LVVLPFPGK                  | sp Q9QX79 FETUB_RAT | 55.32 | 59.32 |
| 694.887886 | 2 | WFVVGLAGNAVQK              | sp P30152 NGAL_RAT  | 67.53 | 71.53 |
| 354.705588 | 2 | VTLYGR                     | sp P30152 NGAL_RAT  | 15.14 | 19.14 |
| 495.776939 | 2 | TKGLSDELK                  | sp P30152 NGAL_RAT  | 11.15 | 15.15 |
| 349.520739 | 3 | GLSDELKER                  | sp P30152 NGAL_RAT  | 19.61 | 23.61 |
| 925.914898 | 2 | DNNIVFSVPTDQC[+57]IDN      | sp P30152 NGAL_RAT  | 83.30 | 87.30 |
| 525.727977 | 2 | FSDAENPR                   | sp P16391 HA12_RAT  | 10.90 | 14.90 |
| 726.367515 | 2 | TWTAADFAAQITR              | sp P16391 HA12_RAT  | 76.61 | 80.61 |
| 361.707797 | 2 | YLELGK                     | sp P16391 HA12_RAT  | 19.93 | 23.93 |
| 626.320033 | 2 | LGQYSSPDTKR                | sp P08649 CO4_RAT   | 8.04  | 12.04 |
| 548.269478 | 2 | LGQYSSPDTK                 | sp P08649 CO4_RAT   | 12.33 | 16.33 |
| 837.781542 | 3 | VTASEPLETLGSEGALSPGGVASLLR | sp P08649 CO4_RAT   | 87.01 | 91.01 |

|            |   |                           |                     |       |       |
|------------|---|---------------------------|---------------------|-------|-------|
| 519.782556 | 2 | DHAVDLIQK                 | sp P08649 CO4_RAT   | 16.65 | 20.65 |
| 814.430509 | 2 | ILSLAQEQIGDSPEK           | sp P08649 CO4_RAT   | 66.16 | 70.16 |
| 661.335349 | 2 | IAELFSDLEER               | sp P05544 SPA3L_RAT | 65.64 | 69.64 |
| 499.30005  | 2 | EVLPELGIK                 | sp P05544 SPA3L_RAT | 46.82 | 50.82 |
| 639.843676 | 2 | KVFSQQADLSR               | sp P05544 SPA3L_RAT | 13.92 | 17.92 |
| 594.324588 | 2 | DLYVSQVVHK                | sp P05544 SPA3L_RAT | 26.42 | 30.42 |
| 820.04125  | 3 | EFQTTDDQC[+57]VYNFTHLGVQR | sp P02764 A1AG_RAT  | 72.28 | 76.28 |
| 527.344595 | 2 | IFAHLIVLK                 | sp P02764 A1AG_RAT  | 43.48 | 47.48 |
| 527.798206 | 2 | KPDLSPELR                 | sp P02764 A1AG_RAT  | 14.97 | 18.97 |
| 591.845687 | 2 | KPDLSPELRK                | sp P02764 A1AG_RAT  | 9.96  | 13.96 |
| 481.295102 | 2 | KIFQQAVK                  | sp P02764 A1AG_RAT  | 7.79  | 11.79 |
| 623.337892 | 2 | QQLELEKETK                | sp P02764 A1AG_RAT  | 11.64 | 15.64 |
| 427.729595 | 2 | GQSLFFR                   | sp Q6DGG1 ABHEB_RAT | 28.31 | 32.31 |
| 390.205952 | 2 | LAEAGYR                   | sp Q6DGG1 ABHEB_RAT | 10.05 | 14.05 |
| 541.321848 | 2 | AVAILPLGLGR               | sp Q6DGG1 ABHEB_RAT | 56.15 | 60.15 |
| 660.336838 | 2 | GYVPVAPIC[+57]TDK         | sp Q6DGG1 ABHEB_RAT | 34.36 | 38.36 |
| 447.227416 | 2 | INAADYAR                  | sp Q6DGG1 ABHEB_RAT | 15.82 | 19.82 |
| 807.730013 | 3 | TPTLIVYGDQDPMGSSSFQHLK    | sp Q6DGG1 ABHEB_RAT | 70.87 | 74.87 |
| 530.745647 | 2 | NC[+57]QSGPLER            | sp P07522 EGF_RAT   | 8.70  | 12.70 |
| 690.883332 | 2 | RPANILVDPTER              | sp P07522 EGF_RAT   | 23.06 | 27.06 |
| 464.758549 | 2 | TLLEAPER                  | sp P07522 EGF_RAT   | 21.27 | 25.27 |
| 729.384031 | 2 | VVHLHAQPGTENR             | sp P07522 EGF_RAT   | 7.72  | 11.72 |
| 527.800217 | 2 | IYFAQTALK                 | sp P07522 EGF_RAT   | 35.80 | 39.80 |
| 546.282585 | 2 | SVIEGSDLSGK               | sp P07522 EGF_RAT   | 19.62 | 23.62 |
| 526.310949 | 2 | SLSLILYSR                 | sp P04276 VTDB_RAT  | 55.28 | 59.28 |



|            |   |                           |                    |       |       |
|------------|---|---------------------------|--------------------|-------|-------|
| 573.766048 | 2 | VC[+57]SQYAAAYGK          | sp P04276 VTDB_RAT | 34.81 | 38.81 |
| 803.435483 | 3 | VPTANLEDVPLAEDLTEILSR     | sp P04276 VTDB_RAT | 69.31 | 73.31 |
| 483.766374 | 2 | ELPEHTLK                  | sp P04276 VTDB_RAT | 19.89 | 23.89 |
| 801.878741 | 2 | MPNASPEELADMVAK           | sp P04276 VTDB_RAT | 65.93 | 69.93 |
| 680.287019 | 2 | YC[+57]SSQIDAEMR          | sp P04276 VTDB_RAT | 22.07 | 26.07 |
| 635.790252 | 2 | SSVTFEC[+57]DLGR          | sp P15083 PIGR_RAT | 34.14 | 38.14 |
| 681.850309 | 2 | ETC[+57]DVIINTLGK         | sp P15083 PIGR_RAT | 46.51 | 50.51 |
| 503.308209 | 2 | FSVLITGLR                 | sp P15083 PIGR_RAT | 56.39 | 60.39 |
| 809.916515 | 2 | GVTGGSVAIVC[+57]PYNPK     | sp P15083 PIGR_RAT | 37.88 | 41.88 |
| 988.498932 | 2 | C[+57]PVLVGTQALVQEGYEGR   | sp P15083 PIGR_RAT | 62.42 | 66.42 |
| 488.46824  | 4 | WSNDGC[+57]HILPSHDEGAR    | sp P15083 PIGR_RAT | 26.14 | 30.14 |
| 538.247491 | 2 | C[+57]PYEEHIK             | sp P02770 ALBU_RAT | 8.24  | 12.24 |
| 575.311146 | 2 | LVQEVTDFAK                | sp P02770 ALBU_RAT | 34.72 | 38.72 |
| 562.252106 | 3 | LRDNYGELADC[+57]C[+57]AK  | sp P02770 ALBU_RAT | 21.41 | 25.41 |
| 733.393533 | 2 | LGEYGFQNAVLVR             | sp P02770 ALBU_RAT | 59.79 | 63.79 |
| 720.396272 | 2 | APQVSTPTLVEAAR            | sp P02770 ALBU_RAT | 33.62 | 37.62 |
| 567.755158 | 2 | C[+57]C[+57]TLPEAQR       | sp P02770 ALBU_RAT | 13.39 | 17.39 |
| 699.882998 | 2 | SVLSPNPLELSSR             | sp Q5FVF9 BTD_RAT  | 51.60 | 55.60 |
| 918.45145  | 2 | QNLDVYEQQVMAAAQK          | sp Q5FVF9 BTD_RAT  | 65.47 | 69.47 |
| 411.714242 | 2 | LSC[+57]MAIK              | sp Q5FVF9 BTD_RAT  | 15.10 | 19.10 |
| 547.307352 | 2 | MFLVANLGTK                | sp Q5FVF9 BTD_RAT  | 53.25 | 57.25 |
| 822.348671 | 2 | QPC[+57]LGSDPGC[+57]PQDGR | sp Q5FVF9 BTD_RAT  | 25.91 | 29.91 |
| 584.271164 | 2 | VLSGDPYC[+57]EK           | sp Q5FVF9 BTD_RAT  | 18.00 | 22.00 |
| 702.378587 | 3 | GC[+57]FSQLQEFAVPLLLLN    | sp O55006 ROB1_RAT | 94.66 | 98.66 |
| 838.389284 | 2 | IHAMGC[+57]ATQTAC[+57]NLK | sp O55006 ROB1_RAT | 18.23 | 22.23 |

|            |   |                                |                    |       |       |
|------------|---|--------------------------------|--------------------|-------|-------|
| 846.386742 | 2 | IHAM[+16]GC[+57]ATQTAC[+57]NLK | sp O55006 ROB1_RAT | 16.83 | 20.83 |
| 520.826766 | 2 | NVILNNIK                       | sp O55006 ROB1_RAT | 36.03 | 40.03 |
| 694.845558 | 2 | IDTSC[+57]VSGSPPLR             | sp O55006 ROB1_RAT | 28.89 | 32.89 |
| 563.27476  | 2 | YSPSLSTDQK                     | sp O55006 ROB1_RAT | 20.14 | 24.14 |
| 715.854103 | 2 | LLPEGDDESSAAVK                 | sp B5DFC9 NID2_RAT | 22.67 | 26.67 |
| 680.85698  | 2 | EDTSQAVLSLAAR                  | sp B5DFC9 NID2_RAT | 49.32 | 53.32 |
| 709.37534  | 2 | ESYINVQLQLPAR                  | sp B5DFC9 NID2_RAT | 47.42 | 51.42 |
| 865.435792 | 2 | EALYFSLTNTEQSVK                | sp B5DFC9 NID2_RAT | 64.67 | 68.67 |
| 650.676571 | 3 | LALDNVRPATVGGDHSTAR            | sp B5DFC9 NID2_RAT | 41.66 | 45.66 |
| 387.185696 | 3 | HC[+57]VPEGAPHR                | sp B5DFC9 NID2_RAT | 15.25 | 19.25 |

---

**Supplementary Table S2.** Identification and quantitation details of the urine proteome identified by the Triple TOF 5600<sup>TM</sup> mass spectrometer.

**Supplementary Table S3.** Identification and quantitation details of the urine proteome identified by the Orbitrap Fusion Lumos mass spectrometer.

**Supplementary Table S4.** Differential proteins at different lung carcinoma metastatic stages using the Triple TOF 5600<sup>TM</sup> mass spectrometer.

**Day 2**

| Protein name                                         | Accession Number | Uniprot ID | C-1-ave | C-2-ave | C-3-ave | C-4-ave | D2-1-ave | D2-2-ave | D2-3-ave | D2-4-ave | Fold change | P-value  |
|------------------------------------------------------|------------------|------------|---------|---------|---------|---------|----------|----------|----------|----------|-------------|----------|
| Galectin-3-binding protein                           | LG3BP_RAT        | O70513     | 6495.23 | 4737.04 | 5202.03 | 4671.91 | 79940.69 | 78119.47 | 55450.62 | 94189.01 | 14.58       | 1.10E-04 |
| Dipeptidyl peptidase 4                               | DPP4_RAT         | P14740     | 1955.42 | 3107.08 | 3448.45 | 2180.77 | 9126.53  | 11199.76 | 13091.26 | 19053.64 | 4.91        | 2.95E-03 |
| Plasma protease C1 inhibitor                         | IC1_RAT          | Q6P734     | 217.80  | 149.58  | 296.34  | 107.65  | 546.70   | 608.40   | 802.14   | 674.84   | 3.41        | 5.01E-04 |
| Peroxiredoxin-6                                      | PRDX6_RAT        | O35244     | 190.32  | 254.11  | 176.82  | 419.56  | 893.46   | 695.53   | 993.51   | 850.25   | 3.30        | 3.70E-04 |
| Ester hydrolase C11orf54 homolog                     | CK054_RAT        | Q5U2Q3     | 296.05  | 242.06  | 654.70  | 356.42  | 767.62   | 1646.60  | 1307.29  | 1378.51  | 3.29        | 5.04E-03 |
| Glutathione S-transferase omega-1                    | GSTO1_RAT        | Q9Z339     | 85.86   | 23.25   | 55.29   | 72.26   | 112.00   | 241.84   | 230.29   | 140.48   | 3.06        | 1.31E-02 |
| Aminoacylase-1A                                      | ACY1A_RAT        | Q6AYS7     | 85.82   | 152.80  | 146.75  | 253.90  | 364.78   | 341.97   | 719.51   | 271.12   | 2.66        | 4.72E-02 |
| Heat shock cognate 71 kDa protein                    | HSP7C_RAT        | P63018     | 292.17  | 528.70  | 713.52  | 596.39  | 1464.03  | 1256.31  | 1570.68  | 848.21   | 2.41        | 6.22E-03 |
| Ezrin                                                | EZRI_RAT         | P31977     | 297.85  | 234.07  | 322.32  | 252.68  | 686.97   | 573.51   | 993.85   | 401.96   | 2.40        | 2.20E-02 |
| 1,2-dihydroxy-3-keto-5-methylthiopentene dioxygenase | MTND_RAT         | Q562C9     | 543.48  | 517.56  | 536.12  | 620.31  | 893.83   | 1628.25  | 939.42   | 1552.68  | 2.26        | 1.20E-02 |
| Eukaryotic translation initiation factor 6           | IF6_RAT          | Q3KRD8     | 105.59  | 138.76  | 308.05  | 218.57  | 469.23   | 505.62   | 432.50   | 311.10   | 2.23        | 8.65E-03 |

|                                        |           |        |            |            |            |           |           |           |           |           |      |          |
|----------------------------------------|-----------|--------|------------|------------|------------|-----------|-----------|-----------|-----------|-----------|------|----------|
| Polymeric immunoglobulin receptor      | PIGR_RAT  | P15083 | 5154.42    | 6163.42    | 4987.62    | 6152.82   | 9422.45   | 11066.83  | 11009.38  | 16628.11  | 2.14 | 7.24E-03 |
| Aminopeptidase N                       | AMPN_RAT  | P15684 | 5377.99    | 6617.70    | 8086.53    | 8134.32   | 14658.06  | 13697.58  | 22977.41  | 8582.10   | 2.12 | 4.09E-02 |
| Complement C4                          | CO4_RAT   | P08649 | 1809.03    | 1995.60    | 2790.75    | 1569.02   | 3877.50   | 5066.54   | 2978.23   | 4848.68   | 2.05 | 7.77E-03 |
| Galectin-5                             | LEG5_RAT  | P47967 | 1628.11    | 1748.44    | 1786.88    | 1586.58   | 3513.37   | 2968.45   | 3338.55   | 3395.38   | 1.96 | 1.44E-05 |
| Protein ABHD14B                        | ABHEB_RAT | Q6DGG1 | 2563.46    | 2723.90    | 3017.87    | 2978.75   | 5325.29   | 7857.20   | 3808.12   | 4457.46   | 1.90 | 2.95E-02 |
| Matrix remodeling-associated protein 8 | MXRA8_RAT | Q5XI43 | 13448.61   | 11221.15   | 11671.83   | 12715.64  | 7186.83   | 7350.99   | 6618.66   | 10715.31  | 0.65 | 6.61E-03 |
| Urinary protein 2                      | UP2_RAT   | P81828 | 1422433.24 | 1241156.59 | 1336532.70 | 873208.70 | 786210.05 | 728893.89 | 807559.12 | 399291.65 | 0.56 | 1.29E-02 |
| Alpha-1-macroglobulin                  | A1M_RAT   | Q63041 | 41056.72   | 68681.06   | 75262.42   | 69051.40  | 31513.57  | 39227.72  | 31880.55  | 20175.34  | 0.48 | 8.76E-03 |
| Prolactin-inducible protein homolog    | PIP_RAT   | O70417 | 4288.10    | 3568.90    | 4011.51    | 4787.17   | 1880.58   | 2874.31   | 1714.33   | 1378.70   | 0.47 | 1.72E-03 |
| Nidogen-2                              | NID2_RAT  | B5DFC9 | 131.11     | 289.05     | 272.20     | 194.16    | 127.90    | 127.44    | 76.51     | 85.60     | 0.47 | 2.38E-02 |
| Apolipoprotein E                       | APOE_RAT  | P02650 | 2501.84    | 2317.07    | 2350.01    | 1837.76   | 1053.41   | 781.66    | 1270.63   | 819.37    | 0.44 | 4.46E-04 |
| Kallikrein-1                           | KLK1_RAT  | P00758 | 109175.32  | 96543.58   | 126167.61  | 66923.88  | 33423.86  | 49989.03  | 37819.89  | 38917.99  | 0.40 | 3.71E-03 |
| Pro-epidermal growth factor            | EGF_RAT   | P07522 | 205469.33  | 256964.18  | 256263.32  | 200314.41 | 80901.99  | 82586.61  | 89569.74  | 108385.39 | 0.39 | 1.64E-04 |
| Urinary protein 3                      | UP3_RAT   | P83121 | 597128.73  | 372590.31  | 437635.55  | 235249.53 | 81893.59  | 109031.28 | 146242.89 | 132467.65 | 0.29 | 8.59E-03 |
| Anthrax toxin receptor 1               | ANTR1_RAT | Q0PMD2 | 423.84     | 535.59     | 906.01     | 1637.22   | 110.42    | 116.35    | 178.17    | 300.00    | 0.20 | 4.52E-02 |

## Day 4

| Protein name                                           | Accession Number | Uniprot ID | C-1-ave | C-2-ave | C-3-ave | C-4-ave | D4-1-ave | D4-2-ave | D4-3-ave | D4-4-ave | Fold change | P-value  |
|--------------------------------------------------------|------------------|------------|---------|---------|---------|---------|----------|----------|----------|----------|-------------|----------|
| Voltage-dependent anion-selective channel protein 1    | VDAC1_RAT        | Q9Z2L0     | 12.08   | 2.23    | 4.36    | 16.60   | 294.92   | 203.92   | 203.54   | 390.09   | 30.97       | 1.04E-03 |
| Chloride intracellular channel protein 1               | CLIC1_RAT        | Q6MG61     | 34.72   | 39.08   | 55.08   | 80.95   | 395.75   | 409.92   | 1161.39  | 457.02   | 11.55       | 2.47E-02 |
| Moesin                                                 | MOES_RAT         | O35763     | 22.32   | 19.04   | 59.26   | 79.61   | 200.89   | 325.96   | 812.73   | 560.16   | 10.54       | 1.94E-02 |
| Galectin-3-binding protein                             | LG3BP_RAT        | O70513     | 6495.23 | 4737.04 | 5202.03 | 4671.91 | 56826.81 | 50470.39 | 36492.42 | 57692.30 | 9.55        | 9.46E-05 |
| RT1 class I histocompatibility antigen, AA alpha chain | HA12_RAT         | P16391     | 10.56   | 82.98   | 5.95    | 68.84   | 326.91   | 94.54    | 329.12   | 523.44   | 7.57        | 2.18E-02 |
| Dipeptidyl peptidase 4                                 | DPP4_RAT         | P14740     | 1955.42 | 3107.08 | 3448.45 | 2180.77 | 13819.20 | 14910.07 | 15303.93 | 25462.24 | 6.50        | 1.71E-03 |
| Fructose-1,6-bisphosphatase 1                          | F16P1_RAT        | P19112     | 5.36    | 37.48   | 72.47   | 81.21   | 166.63   | 263.06   | 279.24   | 157.79   | 4.41        | 3.55E-03 |
| Na(+)/H(+) exchange regulatory cofactor NHE-RF3        | NHRF3_RAT        | Q9JJ40     | 974.57  | 645.47  | 919.39  | 958.93  | 2464.76  | 3903.89  | 5410.83  | 2288.37  | 4.02        | 1.12E-02 |
| Aminoacylase-1A                                        | ACY1A_RAT        | Q6AYS7     | 85.82   | 152.80  | 146.75  | 253.90  | 473.93   | 445.70   | 968.54   | 378.59   | 3.55        | 2.70E-02 |
| Glutamate--cysteine ligase catalytic subunit           | GSH1_RAT         | P19468     | 270.37  | 352.22  | 439.54  | 388.56  | 1073.19  | 1017.30  | 1914.70  | 928.53   | 3.40        | 9.43E-03 |
| Actin, cytoplasmic 2                                   | ACTG_RAT         | P63259     | 912.62  | 928.35  | 1032.83 | 1078.25 | 2600.17  | 2819.61  | 4886.52  | 2280.93  | 3.18        | 1.07E-02 |

|                                                     |           |        |           |          |           |          |           |           |           |           |      |          |
|-----------------------------------------------------|-----------|--------|-----------|----------|-----------|----------|-----------|-----------|-----------|-----------|------|----------|
| Ezrin                                               | EZRI_RAT  | P31977 | 297.85    | 234.07   | 322.32    | 252.68   | 649.33    | 680.92    | 1255.72   | 739.03    | 3.00 | 8.49E-03 |
| Glutathione hydrolase 1 proenzyme                   | GGT1_RAT  | P07314 | 5481.38   | 4078.44  | 5259.52   | 4929.68  | 12522.48  | 12565.62  | 22270.18  | 11772.63  | 2.99 | 7.94E-03 |
| Glutathione S-transferase omega-1                   | GSTO1_RAT | Q9Z339 | 85.86     | 23.25    | 55.29     | 72.26    | 105.08    | 129.96    | 286.88    | 177.79    | 2.96 | 3.43E-02 |
| Neutral and basic amino acid transport protein rBAT | SLC31_RAT | Q64319 | 3351.77   | 4862.65  | 6876.10   | 6753.44  | 11700.29  | 15179.94  | 24655.07  | 11092.86  | 2.87 | 2.00E-02 |
| Uromodulin                                          | UROM_RAT  | P27590 | 134251.79 | 92310.72 | 160725.97 | 64066.37 | 236806.72 | 478172.59 | 353040.49 | 218008.18 | 2.85 | 1.71E-02 |
| Alpha-1-acid glycoprotein                           | A1AG_RAT  | P02764 | 6942.25   | 2688.44  | 9681.74   | 4412.74  | 11474.02  | 22382.77  | 13460.87  | 15595.10  | 2.65 | 1.32E-02 |
| Aminopeptidase N                                    | AMPN_RAT  | P15684 | 5377.99   | 6617.70  | 8086.53   | 8134.32  | 15114.49  | 16822.28  | 21977.22  | 17365.59  | 2.53 | 5.39E-04 |
| Protein RoBo-1                                      | ROB1_RAT  | O55006 | 1406.22   | 1778.47  | 2123.98   | 1187.68  | 3803.30   | 4070.66   | 2631.82   | 5373.83   | 2.44 | 7.86E-03 |
| Plasma protease C1 inhibitor                        | IC1_RAT   | Q6P734 | 217.80    | 149.58   | 296.34    | 107.65   | 503.74    | 583.59    | 316.68    | 439.95    | 2.39 | 8.58E-03 |
| Heat shock cognate 71 kDa protein                   | HSP7C_RAT | P63018 | 292.17    | 528.70   | 713.52    | 596.39   | 1248.52   | 1075.28   | 1588.47   | 1084.35   | 2.34 | 2.99E-03 |
| Fructose-bisphosphate aldolase B                    | ALDOB_RAT | P00884 | 163.12    | 482.09   | 551.71    | 662.71   | 930.12    | 926.42    | 1226.39   | 897.52    | 2.14 | 7.05E-03 |
| Neutrophil gelatinase-associated lipocalin          | NGAL_RAT  | P30152 | 934.08    | 1730.69  | 1282.76   | 1254.48  | 2613.47   | 4155.83   | 2222.15   | 2013.77   | 2.12 | 2.97E-02 |
| Complement C4                                       | CO4_RAT   | P08649 | 1809.03   | 1995.60  | 2790.75   | 1569.02  | 3776.55   | 3472.07   | 4333.48   | 4462.22   | 1.97 | 1.40E-03 |
| Glutamyl aminopeptidase                             | AMPE_RAT  | P50123 | 3133.62   | 3821.76  | 2924.06   | 2868.03  | 5482.84   | 5531.73   | 7344.18   | 6242.66   | 1.93 | 8.90E-04 |
| Galectin-5                                          | LEG5_RAT  | P47967 | 1628.11   | 1748.44  | 1786.88   | 1586.58  | 3578.90   | 2170.76   | 2797.31   | 3765.92   | 1.82 | 9.55E-03 |



|                                                      |           |        |          |          |          |          |          |          |          |          |      |          |
|------------------------------------------------------|-----------|--------|----------|----------|----------|----------|----------|----------|----------|----------|------|----------|
| Elongation factor 1-alpha 1                          | EF1A1_RAT | P62630 | 158.60   | 172.36   | 205.10   | 200.30   | 248.13   | 349.35   | 457.52   | 238.39   | 1.76 | 3.78E-02 |
| Intercellular adhesion molecule 1                    | ICAM1_RAT | Q00238 | 896.79   | 763.94   | 746.70   | 989.22   | 1502.62  | 1383.23  | 1399.11  | 1457.33  | 1.69 | 9.26E-05 |
| Polymeric immunoglobulin receptor                    | PIGR_RAT  | P15083 | 5154.42  | 6163.42  | 4987.62  | 6152.82  | 8753.07  | 7555.02  | 9843.70  | 11304.25 | 1.67 | 4.72E-03 |
| Monocyte differentiation antigen CD14                | CD14_RAT  | Q63691 | 1677.60  | 1313.95  | 1558.14  | 1137.99  | 2082.51  | 2364.06  | 1941.81  | 3026.19  | 1.66 | 1.35E-02 |
| 1,2-dihydroxy-3-keto-5-methylthiopentene dioxygenase | MTND_RAT  | Q562C9 | 543.48   | 517.56   | 536.12   | 620.31   | 669.87   | 857.21   | 944.59   | 1037.30  | 1.58 | 7.44E-03 |
| Protein ABHD14B                                      | ABHEB_RAT | Q6DGG1 | 2563.46  | 2723.90  | 3017.87  | 2978.75  | 4249.93  | 5361.56  | 3207.21  | 4249.43  | 1.51 | 1.88E-02 |
| Glandular kallikrein-7                               | KLK7_RAT  | P36373 | 26508.40 | 25443.40 | 21771.96 | 17632.89 | 13194.74 | 17088.46 | 14301.89 | 16408.81 | 0.67 | 1.38E-02 |
| Matrix remodeling-associated protein 8               | MXRA8_RAT | Q5XI43 | 13448.61 | 11221.15 | 11671.83 | 12715.64 | 7609.13  | 8567.21  | 7127.43  | 9216.62  | 0.66 | 9.63E-04 |
| Gamma-glutamyl hydrolase                             | GGH_RAT   | Q62867 | 11958.96 | 9938.26  | 7858.29  | 10146.09 | 7200.40  | 6885.93  | 5394.30  | 5229.93  | 0.62 | 8.19E-03 |
| Dipeptidyl peptidase 1                               | CATC_RAT  | P80067 | 1558.48  | 1229.80  | 1431.85  | 1316.22  | 546.82   | 1150.78  | 874.37   | 851.20   | 0.62 | 1.00E-02 |
| Biotinidase                                          | BTD_RAT   | Q5FVF9 | 1192.86  | 1350.53  | 1536.79  | 1617.23  | 878.01   | 733.16   | 666.64   | 1139.39  | 0.60 | 6.91E-03 |
| Complement factor D                                  | CFAD_RAT  | P32038 | 23525.53 | 26731.90 | 16684.04 | 18204.12 | 12658.46 | 11650.39 | 10852.25 | 15590.78 | 0.60 | 1.51E-02 |
| Prolactin-inducible protein homolog                  | PIP_RAT   | O70417 | 4288.10  | 3568.90  | 4011.51  | 4787.17  | 2889.18  | 3110.92  | 1749.44  | 1024.91  | 0.53 | 1.19E-02 |

|                               |           |        |           |            |            |           |           |           |           |           |      |          |
|-------------------------------|-----------|--------|-----------|------------|------------|-----------|-----------|-----------|-----------|-----------|------|----------|
| Pro-epidermal growth factor   | EGF_RAT   | P07522 | 205469.33 | 256964.18  | 256263.32  | 200314.41 | 122928.04 | 142527.86 | 98571.02  | 115884.09 | 0.52 | 8.88E-04 |
| Alpha-1-macroglobulin         | A1M_RAT   | Q63041 | 41056.72  | 68681.06   | 75262.42   | 69051.40  | 33721.65  | 39302.82  | 29404.65  | 21509.11  | 0.49 | 8.73E-03 |
| Alpha-2-HS-glycoprotein       | FETUA_RAT | P24090 | 63139.98  | 45308.41   | 39227.32   | 23745.94  | 20299.45  | 19699.25  | 19622.31  | 23295.07  | 0.48 | 3.55E-02 |
| Serine protease inhibitor A3K | SPA3K_RAT | P05545 | 136053.98 | 72266.76   | 96119.60   | 61995.71  | 38597.22  | 46669.11  | 39324.49  | 47889.25  | 0.47 | 2.68E-02 |
| Calbindin                     | CALB1_RAT | P07171 | 2138.46   | 2135.96    | 2264.95    | 3257.98   | 1276.33   | 739.47    | 665.03    | 1928.16   | 0.47 | 1.74E-02 |
| Carboxylesterase 1C           | EST1C_RAT | P10959 | 710.06    | 1063.03    | 931.78     | 821.31    | 408.60    | 299.56    | 470.95    | 445.82    | 0.46 | 1.35E-03 |
| Serine protease inhibitor A3L | SPA3L_RAT | P05544 | 143070.26 | 122102.83  | 114867.72  | 97155.02  | 41901.52  | 50786.54  | 45675.44  | 64656.89  | 0.43 | 6.91E-04 |
| C-reactive protein            | CRP_RAT   | P48199 | 1325.74   | 2517.67    | 3536.33    | 2729.19   | 1155.26   | 1311.73   | 571.81    | 1114.46   | 0.41 | 2.18E-02 |
| Vitamin D-binding protein     | VTDB_RAT  | P04276 | 3002.10   | 3110.91    | 5259.74    | 2024.71   | 1472.05   | 661.77    | 1158.76   | 1734.27   | 0.38 | 2.71E-02 |
| Serotransferrin               | TRFE_RAT  | P12346 | 59073.76  | 73843.06   | 102271.92  | 32671.93  | 26300.04  | 19425.30  | 22024.91  | 29039.06  | 0.36 | 2.69E-02 |
| Kallikrein-1                  | KLK1_RAT  | P00758 | 109175.32 | 96543.58   | 126167.61  | 66923.88  | 32896.12  | 49302.26  | 29933.57  | 30694.79  | 0.36 | 2.98E-03 |
| Serum albumin                 | ALBU_RAT  | P02770 | 755261.22 | 1171882.58 | 1118999.67 | 464187.68 | 358136.85 | 222931.98 | 263403.09 | 399527.10 | 0.35 | 1.61E-02 |
| Parvalbumin alpha             | PRVA_RAT  | P02625 | 922.54    | 385.40     | 424.59     | 448.22    | 146.83    | 151.30    | 217.34    | 140.68    | 0.30 | 2.45E-02 |
| Urinary protein 3             | UP3_RAT   | P83121 | 597128.73 | 372590.31  | 437635.55  | 235249.53 | 123413.25 | 103796.84 | 134295.08 | 60776.64  | 0.26 | 7.37E-03 |
| Fetuin-B                      | FETUB_RAT | Q9QX79 | 1284.70   | 1244.00    | 1593.01    | 361.06    | 261.48    | 67.97     | 116.06    | 315.51    | 0.17 | 1.40E-02 |

## Day 6

| Protein name                                                    | Accession Number | Uniprot ID | C-1-ave  | C-2-ave | C-3-ave  | C-4-ave  | D6-1-ave  | D6-2-ave  | D6-3-ave  | D6-4-ave | Fold change | P-value  |
|-----------------------------------------------------------------|------------------|------------|----------|---------|----------|----------|-----------|-----------|-----------|----------|-------------|----------|
| Voltage-dependent anion-selective channel protein 1 RT1 class I | VDAC1_RAT        | Q9Z2L0     | 12.08    | 2.23    | 4.36     | 16.60    | 124.20    | 101.60    | 318.88    | 319.75   | 24.51       | 1.34E-02 |
| histocompatibility antigen, AA alpha chain                      | HA12_RAT         | P16391     | 10.56    | 82.98   | 5.95     | 68.84    | 755.01    | 294.70    | 1232.19   | 1337.34  | 21.50       | 1.15E-02 |
| Superoxide dismutase [Cu-Zn]                                    | SODC_RAT         | P07632     | 27083.78 | 8448.26 | 11800.68 | 10495.25 | 146476.38 | 389967.80 | 336982.85 | 63022.72 | 16.19       | 2.98E-02 |
| Protein ABHD14B                                                 | ABHEB_RAT        | Q6DGG1     | 2563.46  | 2723.90 | 3017.87  | 2978.75  | 31048.85  | 57506.93  | 41777.80  | 10575.73 | 12.49       | 1.66E-02 |
| Class I histocompatibility antigen, Non-RT1                     | HA11_RAT         | P15978     | 659.95   | 600.99  | 616.90   | 550.82   | 5000.86   | 889.89    | 9335.43   | 9579.71  | 10.21       | 3.48E-02 |
| Chloride intracellular channel protein 1                        | CLIC1_RAT        | Q6MG61     | 34.72    | 39.08   | 55.08    | 80.95    | 348.24    | 232.30    | 592.06    | 214.03   | 6.61        | 1.53E-02 |
| Eukaryotic translation initiation factor 6                      | IF6_RAT          | Q3KRD8     | 105.59   | 138.76  | 308.05   | 218.57   | 893.04    | 1925.39   | 1855.66   | 380.44   | 6.56        | 3.03E-02 |
| Moesin                                                          | MOES_RAT         | O35763     | 22.32    | 19.04   | 59.26    | 79.61    | 250.63    | 206.83    | 208.84    | 464.22   | 6.27        | 9.34E-03 |
| Alpha-1-acid glycoprotein                                       | A1AG_RAT         | P02764     | 6942.25  | 2688.44 | 9681.74  | 4412.74  | 19538.06  | 67596.98  | 41774.04  | 15728.36 | 6.10        | 4.59E-02 |
| Fructose-1,6-bisphosphatase 1                                   | F16P1_RAT        | P19112     | 5.36     | 37.48   | 72.47    | 81.21    | 345.30    | 219.51    | 260.29    | 115.97   | 4.79        | 1.04E-02 |
| 1,2-dihydroxy-3-keto-5-methylthiopentene dioxygenase            | MTND_RAT         | Q562C9     | 543.48   | 517.56  | 536.12   | 620.31   | 1905.35   | 2980.55   | 3147.71   | 2283.50  | 4.65        | 4.56E-04 |

|                                       |           |        |           |          |           |          |           |           |           |           |      |          |
|---------------------------------------|-----------|--------|-----------|----------|-----------|----------|-----------|-----------|-----------|-----------|------|----------|
| 6-phosphogluconolactonase             | 6PGL_RAT  | P85971 | 2358.34   | 4635.95  | 3884.81   | 2349.28  | 9814.13   | 17621.67  | 24608.85  | 6764.28   | 4.45 | 3.08E-02 |
| Galectin-5                            | LEG5_RAT  | P47967 | 1628.11   | 1748.44  | 1786.88   | 1586.58  | 4834.64   | 5285.71   | 10910.10  | 5680.67   | 3.96 | 1.27E-02 |
| Dipeptidyl peptidase 4                | DPP4_RAT  | P14740 | 1955.42   | 3107.08  | 3448.45   | 2180.77  | 7143.00   | 6868.67   | 7407.21   | 14130.47  | 3.32 | 1.32E-02 |
| Complement C4                         | CO4_RAT   | P08649 | 1809.03   | 1995.60  | 2790.75   | 1569.02  | 3949.38   | 8404.87   | 9831.39   | 4863.80   | 3.31 | 1.63E-02 |
| Galectin-3-binding protein            | LG3BP_RAT | O70513 | 6495.23   | 4737.04  | 5202.03   | 4671.91  | 20986.51  | 12304.53  | 14048.10  | 21075.31  | 3.24 | 2.29E-03 |
| Protein RoBo-1                        | ROB1_RAT  | O55006 | 1406.22   | 1778.47  | 2123.98   | 1187.68  | 3843.20   | 6135.96   | 3324.94   | 6022.65   | 2.98 | 5.46E-03 |
| Ezrin                                 | EZRI_RAT  | P31977 | 297.85    | 234.07   | 322.32    | 252.68   | 823.09    | 948.82    | 830.19    | 530.64    | 2.83 | 1.45E-03 |
| Plasma protease C1 inhibitor          | IC1_RAT   | Q6P734 | 217.80    | 149.58   | 296.34    | 107.65   | 589.97    | 538.08    | 585.13    | 296.85    | 2.61 | 8.67E-03 |
| Intercellular adhesion molecule 1     | ICAM1_RAT | Q00238 | 896.79    | 763.94   | 746.70    | 989.22   | 2754.68   | 2274.78   | 2091.40   | 1464.74   | 2.53 | 3.15E-03 |
| Aminoacylase-1A                       | ACY1A_RAT | Q6AYS7 | 85.82     | 152.80   | 146.75    | 253.90   | 468.52    | 333.16    | 452.31    | 269.41    | 2.38 | 9.68E-03 |
| Uromodulin                            | UROM_RAT  | P27590 | 134251.79 | 92310.72 | 160725.97 | 64066.37 | 278075.17 | 245329.77 | 290898.64 | 226925.96 | 2.31 | 1.31E-03 |
| Keratin, type II cytoskeletal 1       | K2C1_RAT  | Q6IMF3 | 1726.96   | 1110.77  | 1024.90   | 1093.09  | 3349.41   | 2768.38   | 1835.52   | 2788.46   | 2.17 | 6.44E-03 |
| Prothrombin                           | THRB_RAT  | P18292 | 14151.57  | 12674.25 | 15071.46  | 9866.89  | 16506.66  | 27027.21  | 34273.28  | 18310.24  | 1.86 | 4.08E-02 |
| Heat shock cognate 71 kDa protein     | HSP7C_RAT | P63018 | 292.17    | 528.70   | 713.52    | 596.39   | 1149.99   | 741.62    | 949.16    | 1019.45   | 1.81 | 1.27E-02 |
| Actin, cytoplasmic 2                  | ACTG_RAT  | P63259 | 912.62    | 928.35   | 1032.83   | 1078.25  | 1857.36   | 2253.24   | 1842.87   | 1136.84   | 1.79 | 1.58E-02 |
| Polymeric immunoglobulin receptor     | PIGR_RAT  | P15083 | 5154.42   | 6163.42  | 4987.62   | 6152.82  | 6665.42   | 11557.07  | 9768.56   | 11026.24  | 1.74 | 1.10E-02 |
| Monocyte differentiation antigen CD14 | CD14_RAT  | Q63691 | 1677.60   | 1313.95  | 1558.14   | 1137.99  | 2616.03   | 2111.20   | 1756.00   | 2997.03   | 1.67 | 1.93E-02 |
| Complement factor D                   | CFAD_RAT  | P32038 | 23525.53  | 26731.90 | 16684.04  | 18204.12 | 8898.00   | 11148.16  | 15789.69  | 14739.81  | 0.59 | 2.23E-02 |

|                                        |           |        |           |           |           |           |           |          |           |           |      |          |
|----------------------------------------|-----------|--------|-----------|-----------|-----------|-----------|-----------|----------|-----------|-----------|------|----------|
| Cadherin-related family member 5       | CDHR5_RAT | Q9JIK1 | 1823.01   | 1528.75   | 1524.30   | 1507.70   | 894.01    | 1174.54  | 849.47    | 787.61    | 0.58 | 1.09E-03 |
| Dipeptidyl peptidase 1                 | CATC_RAT  | P80067 | 1558.48   | 1229.80   | 1431.85   | 1316.22   | 453.10    | 1002.30  | 892.77    | 784.33    | 0.57 | 4.87E-03 |
| Biotinidase                            | BTD_RAT   | Q5FVF9 | 1192.86   | 1350.53   | 1536.79   | 1617.23   | 856.63    | 516.02   | 628.28    | 1041.39   | 0.53 | 4.62E-03 |
| Matrix remodeling-associated protein 8 | MXRA8_RAT | Q5XI43 | 13448.61  | 11221.15  | 11671.83  | 12715.64  | 7350.44   | 2871.25  | 5816.73   | 9507.55   | 0.52 | 7.43E-03 |
| Gamma-glutamyl hydrolase               | GGH_RAT   | Q62867 | 11958.96  | 9938.26   | 7858.29   | 10146.09  | 4847.25   | 4495.88  | 5282.34   | 5992.68   | 0.52 | 1.72E-03 |
| Meprin A subunit alpha                 | MEP1A_RAT | Q64230 | 21520.80  | 23002.06  | 19840.58  | 14924.16  | 11446.55  | 6113.45  | 8669.08   | 13421.27  | 0.50 | 5.85E-03 |
| Alpha-1-macroglobulin                  | A1M_RAT   | Q63041 | 41056.72  | 68681.06  | 75262.42  | 69051.40  | 32227.24  | 26526.82 | 30262.71  | 32694.06  | 0.48 | 5.31E-03 |
| Serine protease inhibitor A3L          | SPA3L_RAT | P05544 | 143070.26 | 122102.83 | 114867.72 | 97155.02  | 40022.45  | 51088.79 | 64757.01  | 60979.90  | 0.45 | 1.04E-03 |
| Calbindin                              | CALB1_RAT | P07171 | 2138.46   | 2135.96   | 2264.95   | 3257.98   | 1241.56   | 1329.71  | 607.72    | 1064.87   | 0.43 | 4.55E-03 |
| Vitamin D-binding protein              | VTDB_RAT  | P04276 | 3002.10   | 3110.91   | 5259.74   | 2024.71   | 1425.30   | 1725.38  | 1303.41   | 1301.06   | 0.43 | 3.23E-02 |
| Pro-epidermal growth factor            | EGF_RAT   | P07522 | 205469.33 | 256964.18 | 256263.32 | 200314.41 | 102117.81 | 67538.25 | 83784.70  | 134102.21 | 0.42 | 7.48E-04 |
| Carboxylesterase 1C                    | EST1C_RAT | P10959 | 710.06    | 1063.03   | 931.78    | 821.31    | 370.89    | 294.73   | 310.48    | 411.80    | 0.39 | 5.55E-04 |
| Serine protease inhibitor A3K          | SPA3K_RAT | P05545 | 136053.98 | 72266.76  | 96119.60  | 61995.71  | 26645.16  | 24747.85 | 39485.27  | 45482.73  | 0.37 | 1.55E-02 |
| Kallikrein-1                           | KLK1_RAT  | P00758 | 109175.32 | 96543.58  | 126167.61 | 66923.88  | 21848.82  | 34298.77 | 34436.21  | 40251.30  | 0.33 | 2.18E-03 |
| Prolactin-inducible protein homolog    | PIP_RAT   | O70417 | 4288.10   | 3568.90   | 4011.51   | 4787.17   | 1771.23   | 745.42   | 1411.81   | 924.75    | 0.29 | 1.42E-04 |
| Apolipoprotein E                       | APOE_RAT  | P02650 | 2501.84   | 2317.07   | 2350.01   | 1837.76   | 706.65    | 493.99   | 495.07    | 646.83    | 0.26 | 3.63E-05 |
| Alpha-1-inhibitor 3                    | A1I3_RAT  | P14046 | 1003.76   | 2150.43   | 2418.99   | 1794.29   | 604.35    | 202.64   | 456.11    | 617.18    | 0.26 | 5.32E-03 |
| Murinoglobulin-1                       | MUG1_RAT  | Q03626 | 329.67    | 644.40    | 802.68    | 526.52    | 117.26    | 30.53    | 210.51    | 160.31    | 0.23 | 5.81E-03 |
| Urinary protein 3                      | UP3_RAT   | P83121 | 597128.73 | 372590.31 | 437635.55 | 235249.53 | 46169.01  | 42795.04 | 120270.47 | 59348.22  | 0.16 | 4.35E-03 |
| Fetuin-B                               | FETUB_RAT | Q9QX79 | 1284.70   | 1244.00   | 1593.01   | 361.06    | 199.47    | 152.67   | 149.75    | 130.37    | 0.14 | 1.10E-02 |

## Day 9

| Protein name                                                    | Accession Number | Uniprot ID | C-1-ave  | C-2-ave  | C-3-ave  | C-4-ave  | D9-1-ave  | D9-2-ave  | D9-3-ave  | D9-4-ave  | Fold change | P-value  |
|-----------------------------------------------------------------|------------------|------------|----------|----------|----------|----------|-----------|-----------|-----------|-----------|-------------|----------|
| Neutrophil gelatinase-associated lipocalin                      | NGAL_RAT         | P30152     | 934.08   | 1730.69  | 1282.76  | 1254.48  | 100267.88 | 93240.80  | 19657.81  | 99675.58  | 60.14       | 7.74E-03 |
| Ig gamma-2B chain C region                                      | IGG2B_RAT        | P20761     | 49.59    | 140.16   | 108.34   | 76.79    | 1920.66   | 2382.62   | 1105.86   | 4399.53   | 26.17       | 1.51E-02 |
| Moesin                                                          | MOES_RAT         | O35763     | 22.32    | 19.04    | 59.26    | 79.61    | 784.81    | 1032.89   | 1055.79   | 876.23    | 20.81       | 1.04E-05 |
| Voltage-dependent anion-selective channel protein 1 RT1 class I | VDAC1_RAT        | Q9Z2L0     | 12.08    | 2.23     | 4.36     | 16.60    | 111.14    | 161.84    | 123.23    | 261.25    | 18.64       | 3.91E-03 |
| histocompatibility antigen, AA alpha chain                      | HA12_RAT         | P16391     | 10.56    | 82.98    | 5.95     | 68.84    | 555.18    | 673.18    | 806.41    | 147.58    | 12.97       | 1.27E-02 |
| Chloride intracellular channel protein 1                        | CLIC1_RAT        | Q6MG61     | 34.72    | 39.08    | 55.08    | 80.95    | 430.88    | 817.45    | 411.89    | 523.65    | 10.41       | 1.95E-03 |
| Alpha-1-acid glycoprotein                                       | A1AG_RAT         | P02764     | 6942.25  | 2688.44  | 9681.74  | 4412.74  | 48431.02  | 82608.22  | 24282.24  | 84007.36  | 10.09       | 9.90E-03 |
| Ester hydrolase C11orf54 homolog                                | CK054_RAT        | Q5U2Q3     | 296.05   | 242.06   | 654.70   | 356.42   | 2929.30   | 5121.04   | 1831.68   | 5714.24   | 10.07       | 8.69E-03 |
| Ig lambda-2 chain C region                                      | LAC2_RAT         | P20767     | 22397.05 | 42535.19 | 50833.92 | 48642.66 | 690166.74 | 202432.98 | 153519.33 | 322266.88 | 8.32        | 4.80E-02 |
| Peroxiredoxin-6                                                 | PRDX6_RAT        | O35244     | 190.32   | 254.11   | 176.82   | 419.56   | 815.21    | 3398.85   | 1428.99   | 1906.10   | 7.25        | 2.60E-02 |
| Ig kappa chain C region, B allele                               | KACB_RAT         | P01835     | 781.45   | 76511.14 | 50950.53 | 96490.70 | 686469.74 | 293967.98 | 214765.14 | 407419.21 | 7.13        | 1.69E-02 |
| Carbonic anhydrase 3                                            | CAH3_RAT         | P14141     | 100.63   | 180.17   | 230.76   | 274.60   | 2071.51   | 1076.27   | 774.95    | 1035.64   | 6.31        | 1.10E-02 |

|                                                 |           |        |          |         |          |          |          |          |          |          |      |          |
|-------------------------------------------------|-----------|--------|----------|---------|----------|----------|----------|----------|----------|----------|------|----------|
| Fructose-1,6-bisphosphatase 1                   | F16P1_RAT | P19112 | 5.36     | 37.48   | 72.47    | 81.21    | 404.58   | 241.78   | 135.38   | 395.18   | 5.99 | 1.07E-02 |
| Ig kappa chain V region S211                    | KVX01_RAT | P01681 | 1399.47  | 1135.12 | 1190.59  | 1308.76  | 12322.10 | 3875.08  | 2919.89  | 7875.02  | 5.36 | 4.31E-02 |
| Ig gamma-2A chain C region                      | IGG2A_RAT | P20760 | 1610.46  | 1052.48 | 1316.68  | 974.07   | 6965.21  | 6175.45  | 2321.32  | 7798.08  | 4.70 | 9.47E-03 |
| Dipeptidyl peptidase 4                          | DPP4_RAT  | P14740 | 1955.42  | 3107.08 | 3448.45  | 2180.77  | 7604.03  | 11804.11 | 9630.61  | 11526.64 | 3.79 | 3.65E-04 |
| Na(+)/H(+) exchange regulatory cofactor NHE-RF1 | NHRF1_RAT | Q9JJ19 | 1152.88  | 343.64  | 873.70   | 501.33   | 1801.60  | 3875.69  | 1684.76  | 3150.10  | 3.66 | 1.46E-02 |
| Na(+)/H(+) exchange regulatory cofactor NHE-RF3 | NHRF3_RAT | Q9JJ40 | 974.57   | 645.47  | 919.39   | 958.93   | 2854.30  | 3420.30  | 2007.38  | 4191.61  | 3.57 | 2.99E-03 |
| Cathepsin S                                     | CATS_RAT  | Q02765 | 833.03   | 797.42  | 650.10   | 1671.21  | 3719.22  | 3476.16  | 3005.57  | 3814.24  | 3.55 | 1.38E-04 |
| Plasma protease C1 inhibitor                    | IC1_RAT   | Q6P734 | 217.80   | 149.58  | 296.34   | 107.65   | 527.61   | 770.08   | 688.96   | 651.89   | 3.42 | 3.75E-04 |
| Actin, cytoplasmic 2                            | ACTG_RAT  | P63259 | 912.62   | 928.35  | 1032.83  | 1078.25  | 3173.19  | 3494.49  | 3906.11  | 2668.38  | 3.35 | 1.21E-04 |
| Superoxide dismutase [Cu-Zn]                    | SODC_RAT  | P07632 | 27083.78 | 8448.26 | 11800.68 | 10495.25 | 45635.17 | 45853.92 | 34399.04 | 53065.75 | 3.09 | 1.89E-03 |
| Isopentenyl-diphosphate Delta-isomerase 1       | IDI1_RAT  | O35760 | 12.18    | 21.91   | 31.39    | 14.25    | 65.80    | 53.18    | 58.16    | 50.83    | 2.86 | 5.05E-04 |
| Protein RoBo-1                                  | ROB1_RAT  | O55006 | 1406.22  | 1778.47 | 2123.98  | 1187.68  | 3297.17  | 4009.11  | 4115.01  | 6833.27  | 2.81 | 1.07E-02 |
| Ezrin                                           | EZRI_RAT  | P31977 | 297.85   | 234.07  | 322.32   | 252.68   | 548.45   | 1086.78  | 699.54   | 732.01   | 2.77 | 5.48E-03 |
| Galectin-3-binding protein                      | LG3BP_RAT | O70513 | 6495.23  | 4737.04 | 5202.03  | 4671.91  | 13103.45 | 12517.30 | 18361.52 | 12803.73 | 2.69 | 8.65E-04 |

|                                                              |           |        |         |         |         |         |          |          |         |         |      |          |
|--------------------------------------------------------------|-----------|--------|---------|---------|---------|---------|----------|----------|---------|---------|------|----------|
| Keratin, type II<br>cytoskeletal 1                           | K2C1_RAT  | Q6IMF3 | 1726.96 | 1110.77 | 1024.90 | 1093.09 | 3759.53  | 3390.89  | 2572.78 | 3129.39 | 2.59 | 5.75E-04 |
| Eukaryotic translation<br>initiation factor 6                | IF6_RAT   | Q3KRD8 | 105.59  | 138.76  | 308.05  | 218.57  | 496.93   | 526.00   | 440.68  | 514.47  | 2.57 | 8.37E-04 |
| Aminoacylase-1A                                              | ACY1A_RAT | Q6AYS7 | 85.82   | 152.80  | 146.75  | 253.90  | 315.08   | 419.83   | 433.70  | 399.23  | 2.45 | 1.83E-03 |
| Nuclear transport factor 2                                   | NTF2_RAT  | P61972 | 318.52  | 351.86  | 279.76  | 226.52  | 1031.93  | 644.67   | 556.88  | 430.97  | 2.26 | 3.07E-02 |
| Glutamate--cysteine ligase<br>catalytic subunit              | GSH1_RAT  | P19468 | 270.37  | 352.22  | 439.54  | 388.56  | 717.78   | 914.50   | 677.23  | 920.70  | 2.23 | 9.09E-04 |
| Protein ABHD14B                                              | ABHEB_RAT | Q6DGG1 | 2563.46 | 2723.90 | 3017.87 | 2978.75 | 7138.45  | 5359.08  | 6610.38 | 5816.89 | 2.21 | 1.69E-04 |
| Heat shock cognate 71<br>kDa protein                         | HSP7C_RAT | P63018 | 292.17  | 528.70  | 713.52  | 596.39  | 997.76   | 1150.69  | 1126.25 | 1368.93 | 2.18 | 1.75E-03 |
| Complement C4                                                | CO4_RAT   | P08649 | 1809.03 | 1995.60 | 2790.75 | 1569.02 | 2972.69  | 3535.73  | 3618.15 | 6198.46 | 2.00 | 3.76E-02 |
| Monocyte differentiation<br>antigen CD14                     | CD14_RAT  | Q63691 | 1677.60 | 1313.95 | 1558.14 | 1137.99 | 2218.16  | 2483.38  | 2404.87 | 4069.74 | 1.96 | 2.17E-02 |
| Glutathione hydrolase 1<br>proenzyme                         | GGT1_RAT  | P07314 | 5481.38 | 4078.44 | 5259.52 | 4929.68 | 9210.18  | 13274.63 | 7267.09 | 8902.94 | 1.96 | 1.14E-02 |
| Neutral and basic amino<br>acid transport protein<br>rBAT    | SLC31_RAT | Q64319 | 3351.77 | 4862.65 | 6876.10 | 6753.44 | 10094.11 | 14130.81 | 8504.10 | 9610.98 | 1.94 | 1.37E-02 |
| 1,2-dihydroxy-3-keto-5-<br>methylthiopentene<br>dioxxygenase | MTND_RAT  | Q562C9 | 543.48  | 517.56  | 536.12  | 620.31  | 740.66   | 1052.35  | 1137.81 | 1012.46 | 1.78 | 2.82E-03 |
| Intercellular adhesion<br>molecule 1                         | ICAM1_RAT | Q00238 | 896.79  | 763.94  | 746.70  | 989.22  | 1460.87  | 1244.53  | 1308.77 | 1507.44 | 1.63 | 7.58E-04 |



|                                             |           |        |          |          |          |          |          |          |          |          |      |          |
|---------------------------------------------|-----------|--------|----------|----------|----------|----------|----------|----------|----------|----------|------|----------|
| Polymeric immunoglobulin receptor           | PIGR_RAT  | P15083 | 5154.42  | 6163.42  | 4987.62  | 6152.82  | 7957.51  | 9674.13  | 9028.05  | 8819.31  | 1.58 | 4.73E-04 |
| Protein/nucleic acid deglycase DJ-1         | PARK7_RAT | O88767 | 198.14   | 251.05   | 283.61   | 231.67   | 372.93   | 326.05   | 417.85   | 387.09   | 1.56 | 2.11E-03 |
| Phosphatidylethanolamine-binding protein 1  | PEBP1_RAT | P31044 | 561.97   | 597.09   | 841.43   | 646.53   | 1167.17  | 960.34   | 1084.07  | 911.98   | 1.56 | 4.92E-03 |
| Aminopeptidase N                            | AMPN_RAT  | P15684 | 5377.99  | 6617.70  | 8086.53  | 8134.32  | 9868.21  | 13874.99 | 8797.72  | 10502.67 | 1.53 | 2.74E-02 |
| CD48 antigen                                | CD48_RAT  | P10252 | 5855.87  | 9456.36  | 5330.70  | 6624.84  | 4648.73  | 3514.90  | 4947.28  | 4598.57  | 0.65 | 4.91E-02 |
| Prothrombin                                 | THRB_RAT  | P18292 | 14151.57 | 12674.25 | 15071.46 | 9866.89  | 7992.13  | 7907.35  | 8118.10  | 9274.61  | 0.64 | 7.91E-03 |
| Putative phospholipase B-like 2             | PLBL2_RAT | Q4QQW8 | 270.61   | 371.29   | 297.49   | 322.57   | 141.94   | 230.83   | 176.85   | 219.27   | 0.61 | 5.88E-03 |
| Cadherin-related family member 5            | CDHR5_RAT | Q9JIK1 | 1823.01  | 1528.75  | 1524.30  | 1507.70  | 624.91   | 1180.95  | 1005.10  | 959.07   | 0.59 | 3.29E-03 |
| Sialate O-acetyltransferase                 | SIAE_RAT  | P82450 | 536.61   | 566.99   | 424.39   | 454.93   | 292.80   | 402.58   | 276.94   | 197.52   | 0.59 | 9.29E-03 |
| Mepripin A subunit alpha                    | MEP1A_RAT | Q64230 | 21520.80 | 23002.06 | 19840.58 | 14924.16 | 10692.54 | 10445.42 | 11656.94 | 13581.51 | 0.58 | 4.86E-03 |
| Matrix remodeling-associated protein 8      | MXRA8_RAT | Q5XI43 | 13448.61 | 11221.15 | 11671.83 | 12715.64 | 6985.04  | 5034.07  | 9450.39  | 5772.74  | 0.56 | 2.45E-03 |
| Choline transporter-like protein 4          | CTL4_RAT  | Q6MG71 | 859.66   | 523.07   | 611.69   | 418.55   | 222.10   | 301.35   | 367.57   | 313.25   | 0.50 | 2.23E-02 |
| Glandular kallikrein-7, submandibular/renal | KLK7_RAT  | P36373 | 26508.40 | 25443.40 | 21771.96 | 17632.89 | 9997.91  | 11227.99 | 10347.48 | 13888.49 | 0.50 | 1.96E-03 |
| Fatty acid-binding protein, brain           | FABP7_RAT | P55051 | 11861.09 | 11774.35 | 8476.35  | 7715.40  | 4983.67  | 4257.74  | 3048.11  | 7398.16  | 0.49 | 1.22E-02 |
| Biotinidase                                 | BTD_RAT   | Q5FVF9 | 1192.86  | 1350.53  | 1536.79  | 1617.23  | 859.71   | 527.62   | 1055.40  | 368.36   | 0.49 | 7.53E-03 |
| Apolipoprotein A-IV                         | APOA4_RAT | P02651 | 35825.40 | 69563.91 | 53286.01 | 74613.03 | 29683.09 | 25344.69 | 22630.05 | 33228.64 | 0.48 | 1.50E-02 |

|                                                    |           |        |           |            |            |           |           |           |           |           |      |          |
|----------------------------------------------------|-----------|--------|-----------|------------|------------|-----------|-----------|-----------|-----------|-----------|------|----------|
| Carboxylesterase 1C                                | EST1C_RAT | P10959 | 710.06    | 1063.03    | 931.78     | 821.31    | 361.50    | 369.60    | 407.06    | 478.25    | 0.46 | 9.99E-04 |
| Low-density lipoprotein receptor-related protein 2 | LRP2_RAT  | P98158 | 19807.02  | 46295.08   | 40558.47   | 32906.14  | 13935.32  | 15994.91  | 13354.82  | 18033.10  | 0.44 | 1.53E-02 |
| Corticosteroid-binding globulin                    | CBG_RAT   | P31211 | 8401.20   | 4452.49    | 5832.69    | 7495.63   | 3119.42   | 2608.98   | 2846.14   | 2857.72   | 0.44 | 5.85E-03 |
| Cathepsin L1                                       | CATL1_RAT | P07154 | 844.76    | 1203.85    | 1082.40    | 821.67    | 321.22    | 393.77    | 543.71    | 395.12    | 0.42 | 1.48E-03 |
| Lysosomal alpha-glucosidase                        | LYAG_RAT  | Q6P7A9 | 1092.02   | 2264.26    | 1966.05    | 1276.37   | 788.69    | 575.23    | 836.44    | 372.45    | 0.39 | 1.49E-02 |
| Gamma-glutamyl hydrolase                           | GGH_RAT   | Q62867 | 11958.96  | 9938.26    | 7858.29    | 10146.09  | 3759.44   | 4519.91   | 3271.35   | 3871.28   | 0.39 | 4.32E-04 |
| Alpha-1-macroglobulin                              | AIM_RAT   | Q63041 | 41056.72  | 68681.06   | 75262.42   | 69051.40  | 28409.45  | 26198.22  | 16752.80  | 26506.35  | 0.39 | 2.89E-03 |
| Apolipoprotein E                                   | APOE_RAT  | P02650 | 2501.84   | 2317.07    | 2350.01    | 1837.76   | 669.47    | 728.29    | 672.81    | 1320.88   | 0.38 | 5.98E-04 |
| Serine protease inhibitor A3K                      | SPA3K_RAT | P05545 | 136053.98 | 72266.76   | 96119.60   | 61995.71  | 27144.28  | 37095.54  | 35234.15  | 35721.93  | 0.37 | 1.31E-02 |
| Fibronectin                                        | FINC_RAT  | P04937 | 22856.12  | 18705.32   | 21644.26   | 18210.11  | 7897.20   | 7388.69   | 7788.53   | 6888.14   | 0.37 | 3.05E-05 |
| Parvalbumin alpha                                  | PRVA_RAT  | P02625 | 922.54    | 385.40     | 424.59     | 448.22    | 186.48    | 236.81    | 167.91    | 203.83    | 0.36 | 3.46E-02 |
| Alpha-2-HS-glycoprotein                            | FETUA_RAT | P24090 | 63139.98  | 45308.41   | 39227.32   | 23745.94  | 16582.75  | 14722.10  | 12250.28  | 16549.83  | 0.35 | 1.47E-02 |
| Serum albumin                                      | ALBU_RAT  | P02770 | 755261.22 | 1171882.58 | 1118999.67 | 464187.68 | 276630.91 | 321743.10 | 228003.28 | 331545.78 | 0.33 | 1.27E-02 |
| Kallikrein-1                                       | KLK1_RAT  | P00758 | 109175.32 | 96543.58   | 126167.61  | 66923.88  | 30605.51  | 30600.12  | 26669.21  | 41665.94  | 0.32 | 1.99E-03 |
| C-reactive protein                                 | CRP_RAT   | P48199 | 1325.74   | 2517.67    | 3536.33    | 2729.19   | 596.64    | 1048.99   | 706.64    | 913.92    | 0.32 | 1.06E-02 |
| Pro-epidermal growth factor                        | EGF_RAT   | P07522 | 205469.33 | 256964.18  | 256263.32  | 200314.41 | 77696.33  | 65493.16  | 53727.95  | 78254.82  | 0.30 | 6.90E-05 |
| Serine protease inhibitor A3L                      | SPA3L_RAT | P05544 | 143070.26 | 122102.83  | 114867.72  | 97155.02  | 30818.75  | 34891.24  | 36585.93  | 32308.75  | 0.28 | 1.10E-04 |

|                                     |           |        |           |           |           |           |           |          |          |          |      |          |
|-------------------------------------|-----------|--------|-----------|-----------|-----------|-----------|-----------|----------|----------|----------|------|----------|
| Prolactin-inducible protein homolog | PIP_RAT   | O70417 | 4288.10   | 3568.90   | 4011.51   | 4787.17   | 853.10    | 1162.50  | 248.04   | 2111.20  | 0.26 | 5.80E-04 |
| Alpha-1-inhibitor 3                 | A1I3_RAT  | P14046 | 1003.76   | 2150.43   | 2418.99   | 1794.29   | 496.57    | 404.25   | 599.96   | 421.87   | 0.26 | 4.65E-03 |
| Murinoglobulin-1                    | MUG1_RAT  | Q03626 | 329.67    | 644.40    | 802.68    | 526.52    | 152.91    | 161.03   | 92.32    | 81.27    | 0.21 | 4.27E-03 |
| Calbindin                           | CALB1_RAT | P07171 | 2138.46   | 2135.96   | 2264.95   | 3257.98   | 487.50    | 355.20   | 759.29   | 461.05   | 0.21 | 4.97E-04 |
| Urinary protein 3                   | UP3_RAT   | P83121 | 597128.73 | 372590.31 | 437635.55 | 235249.53 | 103345.12 | 89775.89 | 63860.14 | 62994.70 | 0.19 | 4.75E-03 |
| Fetuin-B                            | FETUB_RAT | Q9QX79 | 1284.70   | 1244.00   | 1593.01   | 361.06    | 134.05    | 13.15    | 89.59    | 72.47    | 0.07 | 7.79E-03 |

---

**Supplementary Table S5.** Differential proteins at different lung carcinoma metastatic stages using the Orbitrap Fusion Lumos mass spectrometer.

**Day 2**

| Protein name                                                 | Accession Number | Uniprot ID | C-1-ave | C-2-ave | C-3-ave | D2-1-ave | D2-2-ave | D2-3-ave | Fold change | P-value  |
|--------------------------------------------------------------|------------------|------------|---------|---------|---------|----------|----------|----------|-------------|----------|
| Transforming protein RhoA                                    | RHOA_RAT         | P61589     | 0       | 2       | 0       | 7.5      | 4        | 4.5      | 8.00        | 2.19E-02 |
| Pancreatic secretory granule membrane major glycoprotein GP2 | GP2_RAT          | P19218     | 0.5     | 5.5     | 0.5     | 6.5      | 16       | 11.5     | 5.23        | 4.61E-02 |
| Galectin-3-binding protein                                   | LG3BP_RAT        | O70513     | 14      | 11.5    | 13      | 38       | 76       | 55       | 4.39        | 1.68E-02 |
| Na(+)/H(+) exchange regulatory cofactor NHE-RF1              | NHRF1_RAT        | Q9JJ19     | 8       | 4.5     | 10.5    | 28.5     | 30.5     | 27.5     | 3.76        | 4.09E-04 |
| Peptidyl-prolyl cis-trans isomerase A                        | PPIA_RAT         | P10111     | 2.5     | 3.5     | 2.5     | 9.5      | 8.5      | 12       | 3.53        | 2.80E-03 |
| Uromodulin                                                   | UROM_RAT         | P27590     | 83      | 56.5    | 81      | 160      | 332.5    | 232.5    | 3.29        | 2.95E-02 |
| Class I histocompatibility antigen, Non-RT1.A alpha-1 chain  | HA11_RAT         | P15978     | 5.5     | 6       | 5       | 11       | 20.5     | 22.5     | 3.27        | 2.46E-02 |
| Brain acid soluble protein 1                                 | BASP1_RAT        | Q05175     | 2.5     | 0.5     | 1.5     | 6        | 5        | 3.5      | 3.22        | 2.29E-02 |
| RT1 class I histocompatibility antigen, AA alpha chain       | HA12_RAT         | P16391     | 5.5     | 8       | 4       | 9        | 17.5     | 18.5     | 2.57        | 4.70E-02 |
| Neutrophil gelatinase-associated lipocalin                   | NGAL_RAT         | P30152     | 1.5     | 4       | 4       | 9        | 7.5      | 5        | 2.26        | 4.93E-02 |
| Thioredoxin                                                  | THIO_RAT         | P11232     | 4.5     | 2.5     | 4.5     | 6        | 8.5      | 11.5     | 2.26        | 4.86E-02 |

|                                                    |                  |        |       |       |       |      |      |      |      |          |
|----------------------------------------------------|------------------|--------|-------|-------|-------|------|------|------|------|----------|
| Alpha/beta hydrolase domain-containing protein 14B | ABHEB_RAT        | Q6DGG1 | 4     | 7.5   | 6     | 10   | 12.5 | 12   | 1.97 | 1.11E-02 |
| Gamma-glutamyltranspeptidase 1                     | GGT1_RAT         | P07314 | 16.5  | 13    | 16.5  | 34   | 29   | 27   | 1.96 | 3.55E-03 |
| Alpha-enolase                                      | ENOA_RAT         | P04764 | 9.5   | 11.5  | 11.5  | 19.5 | 21   | 15.5 | 1.72 | 1.15E-02 |
| Galectin-9                                         | LEG9_RAT         | P97840 | 4.5   | 3     | 4     | 5    | 6    | 7    | 1.57 | 4.06E-02 |
| Pro-epidermal growth factor                        | EGF_RAT          | P07522 | 128   | 149.5 | 144.5 | 75.5 | 108  | 93.5 | 0.66 | 1.34E-02 |
| Gelsolin                                           | GELS_RAT         | Q68FP1 | 29.5  | 30.5  | 24.5  | 20   | 16   | 19   | 0.65 | 1.13E-02 |
| Alpha-1-macroglobulin                              | A1M_RAT          | Q63041 | 97    | 124.5 | 130.5 | 75.5 | 78   | 73.5 | 0.64 | 1.60E-02 |
| Fetuin-B                                           | FETUB_RAT        | Q9QX79 | 20    | 21.5  | 18    | 9.5  | 12   | 16.5 | 0.64 | 3.50E-02 |
| Biotinidase                                        | BTD_RAT          | Q5FVF9 | 12.5  | 13.5  | 12.5  | 8    | 6.5  | 9    | 0.61 | 3.33E-03 |
| Sialidase-1                                        | NEUR1_RAT        | Q99PW3 | 7     | 8     | 6.5   | 3.5  | 5.5  | 4    | 0.60 | 1.91E-02 |
| Lysosomal thioesterase PPT2                        | PPT2_RAT         | O70489 | 5.5   | 6.5   | 5     | 4.5  | 2.5  | 3    | 0.59 | 3.52E-02 |
| Ig kappa chain C region, A allele                  | KACA_RAT         | P01836 | 112.5 | 100.5 | 74    | 71   | 50   | 46.5 | 0.58 | 4.39E-02 |
| Nuclear transport factor 2                         | NTF2_RAT         | P61972 | 4.5   | 4.5   | 4     | 3    | 2.5  | 2    | 0.58 | 5.33E-03 |
| Serum albumin                                      | ALBU_RAT         | P02770 | 257   | 278.5 | 308   | 191  | 129  | 160  | 0.57 | 6.43E-03 |
| Nidogen-1 (Fragment)                               | NID1_RAT         | P08460 | 11.5  | 12    | 10.5  | 9    | 3    | 6    | 0.53 | 4.06E-02 |
| Serine protease inhibitor A3L                      | SPA3L_RAT        | P05544 | 159.5 | 145.5 | 116   | 59   | 69.5 | 93.5 | 0.53 | 1.55E-02 |
| Angiotensinogen                                    | ANGT_RAT         | P01015 | 8.5   | 8.5   | 10    | 7.5  | 3.5  | 3    | 0.52 | 4.54E-02 |
| Cluster of Carboxylesterase 1C                     | EST1C_RAT<br>[4] | P10959 | 14    | 14    | 16.5  | 10.5 | 4.5  | 8    | 0.52 | 2.06E-02 |
| Multiple inositol polyphosphate phosphatase 1      | MINP1_RAT        | O35217 | 10.5  | 12.5  | 11.5  | 6    | 2.5  | 9    | 0.51 | 4.48E-02 |
| Attractin                                          | ATRN_RAT         | Q99J86 | 10.5  | 14    | 13    | 4    | 8    | 7    | 0.51 | 1.79E-02 |

|                                           |           |        |      |      |      |      |     |      |      |          |
|-------------------------------------------|-----------|--------|------|------|------|------|-----|------|------|----------|
| Apolipoprotein E                          | APOE_RAT  | P02650 | 18   | 17.5 | 20.5 | 7.5  | 9   | 11.5 | 0.50 | 3.32E-03 |
| Urinary protein 3                         | UP3_RAT   | P83121 | 98.5 | 89   | 89   | 32   | 77  | 26.5 | 0.49 | 4.49E-02 |
| Protein disulfide-isomerase               | PDIA1_RAT | P04785 | 7    | 5    | 5    | 3    | 1.5 | 3.5  | 0.47 | 2.88E-02 |
| Nidogen-2                                 | NID2_RAT  | B5DFC9 | 5    | 9    | 8.5  | 4    | 2   | 4    | 0.44 | 4.30E-02 |
| Neogenin (Fragment)                       | NEO1_RAT  | P97603 | 4.5  | 5.5  | 5    | 2    | 1.5 | 3    | 0.43 | 5.78E-03 |
| Procollagen C-endopeptidase<br>enhancer 1 | PCOC1_RAT | O08628 | 3    | 5    | 5    | 2    | 1.5 | 1.5  | 0.38 | 1.78E-02 |
| Vitamin D-binding protein                 | VTDB_RAT  | P04276 | 42   | 42.5 | 51   | 23.5 | 5   | 21   | 0.37 | 1.15E-02 |
| Activin receptor type-1B                  | ACV1B_RAT | P80202 | 6    | 4    | 3    | 1    | 2.5 | 1    | 0.35 | 4.91E-02 |
| Dipeptidyl peptidase 1                    | CATC_RAT  | P80067 | 12.5 | 15   | 8.5  | 4.5  | 4   | 3.5  | 0.33 | 1.39E-02 |
| Retinol-binding protein 4                 | RET4_RAT  | P04916 | 5.5  | 3.5  | 5    | 1    | 1.5 | 1.5  | 0.29 | 5.90E-03 |
| Growth arrest-specific protein<br>6       | GAS6_RAT  | Q63772 | 6.5  | 7.5  | 6    | 2    | 1.5 | 1.5  | 0.25 | 4.47E-04 |
| Apolipoprotein A-IV                       | APOA4_RAT | P02651 | 6    | 8.5  | 9    | 0.5  | 0.5 | 1.5  | 0.11 | 2.08E-03 |

## Day 4

| Protein name                                                      | Accession Number | Uniprot ID | C-1-ave | C-2-ave | C-3-ave | D4-1-ave | D4-2-ave | D4-3-ave | Fold change | P-value  |
|-------------------------------------------------------------------|------------------|------------|---------|---------|---------|----------|----------|----------|-------------|----------|
| NKG2-D type II integral membrane protein                          | NKG2D_RAT        | O70215     | 0       | 1.5     | 0       | 4        | 3.5      | 6.5      | 9.33        | 1.68E-02 |
| Class I histocompatibility antigen, Non-RT1.A alpha-1 chain       | HA11_RAT         | P15978     | 5.5     | 6       | 5       | 21.5     | 38.5     | 32       | 5.58        | 7.12E-03 |
| N-acyl-aromatic-L-amino acid amidohydrolase (carboxylate-forming) | ACY3_RAT         | Q5M876     | 1       | 1.5     | 2       | 8.5      | 3        | 7.5      | 4.22        | 4.80E-02 |
| RT1 class I histocompatibility antigen, AA alpha chain            | HA12_RAT         | P16391     | 5.5     | 8       | 4       | 13.5     | 29       | 28       | 4.03        | 2.64E-02 |
| Galectin-3-binding protein                                        | LG3BP_RAT        | O70513     | 14      | 11.5    | 13      | 38.5     | 67.5     | 33       | 3.61        | 3.54E-02 |
| Neutrophil gelatinase-associated lipocalin                        | NGAL_RAT         | P30152     | 1.5     | 4       | 4       | 10.5     | 12.5     | 7.5      | 3.21        | 1.39E-02 |
| Rho GDP-dissociation inhibitor 1                                  | GDIR1_RAT        | Q5XI73     | 1       | 3       | 0.5     | 5.5      | 4.5      | 4        | 3.11        | 2.29E-02 |
| Complement C4                                                     | CO4_RAT          | P08649     | 4.5     | 7.5     | 14.5    | 34       | 20       | 26       | 3.02        | 2.38E-02 |
| G-protein coupled receptor family C group 5 member C              | GPC5C_RAT        | Q3KRC4     | 1       | 3.5     | 4       | 9.5      | 6.5      | 6        | 2.59        | 3.49E-02 |
| Nepilysin                                                         | NEP_RAT          | P07861     | 13      | 12.5    | 16      | 42.5     | 23.5     | 38       | 2.51        | 2.34E-02 |
| Thioredoxin                                                       | THIO_RAT         | P11232     | 4.5     | 2.5     | 4.5     | 7.5      | 8        | 9        | 2.13        | 5.61E-03 |
| Protein RoBo-1                                                    | ROB1_RAT         | O55006     | 5.5     | 4.5     | 4.5     | 9        | 10       | 10       | 2.00        | 5.10E-04 |
| Gamma-glutamyltranspeptidase 1                                    | GGT1_RAT         | P07314     | 16.5    | 13      | 16.5    | 35       | 27.5     | 28       | 1.97        | 5.26E-03 |
| Alpha-1-acid glycoprotein                                         | A1AG_RAT         | P02764     | 14      | 13      | 22      | 27       | 37.5     | 29       | 1.91        | 2.60E-02 |

|                                   |                  |        |       |       |       |       |       |       |      |          |
|-----------------------------------|------------------|--------|-------|-------|-------|-------|-------|-------|------|----------|
| Polymeric immunoglobulin receptor | PIGR_RAT         | P15083 | 28.5  | 31.5  | 32    | 36    | 55    | 52    | 1.55 | 4.71E-02 |
| Lysosomal thioesterase PPT2       | PPT2_RAT         | O70489 | 5.5   | 6.5   | 5     | 3.5   | 4     | 3     | 0.62 | 1.47E-02 |
| Attractin                         | ATRN_RAT         | Q99J86 | 10.5  | 14    | 13    | 8     | 7.5   | 7.5   | 0.61 | 1.01E-02 |
| Alpha-1-macroglobulin             | A1M_RAT          | Q63041 | 97    | 124.5 | 130.5 | 77    | 71    | 67.5  | 0.61 | 1.30E-02 |
| Fetuin-B                          | FETUB_RAT        | Q9QX79 | 20    | 21.5  | 18    | 11    | 11.5  | 13.5  | 0.61 | 3.50E-03 |
| Growth arrest-specific protein 6  | GAS6_RAT         | Q63772 | 6.5   | 7.5   | 6     | 3.5   | 4     | 4.5   | 0.60 | 7.18E-03 |
| Biotinidase                       | BTD_RAT          | Q5FVF9 | 12.5  | 13.5  | 12.5  | 6     | 5.5   | 10    | 0.56 | 1.79E-02 |
| Serum albumin                     | ALBU_RAT         | P02770 | 257   | 278.5 | 308   | 126.5 | 179.5 | 127.5 | 0.51 | 3.97E-03 |
| Serine protease inhibitor A3L     | SPA3L_RAT        | P05544 | 159.5 | 145.5 | 116   | 36.5  | 95.5  | 73.5  | 0.49 | 2.87E-02 |
| Urinary protein 3                 | UP3_RAT          | P83121 | 98.5  | 89    | 89    | 19    | 55    | 48    | 0.44 | 1.09E-02 |
| Beta-2-glycoprotein 1             | APOH_RAT         | P26644 | 14.5  | 10    | 13    | 3.5   | 4     | 8     | 0.41 | 1.96E-02 |
| Cluster of Carboxylesterase 1C    | EST1C_RAT<br>[4] | P10959 | 14    | 14    | 16.5  | 4.5   | 3     | 10    | 0.39 | 1.70E-02 |
| Urinary protein 2                 | UP2_RAT          | P81828 | 132   | 104.5 | 105   | 21.5  | 54.5  | 52    | 0.37 | 7.00E-03 |
| Vitamin D-binding protein         | VTDB_RAT         | P04276 | 42    | 42.5  | 51    | 15    | 15.5  | 14    | 0.33 | 5.07E-04 |
| Retinol-binding protein 4         | RET4_RAT         | P04916 | 5.5   | 3.5   | 5     | 0.5   | 2     | 2     | 0.32 | 1.55E-02 |
| Dipeptidyl peptidase 1            | CATC_RAT         | P80067 | 12.5  | 15    | 8.5   | 5     | 2.5   | 3.5   | 0.31 | 1.47E-02 |
| Cluster of Alpha-1-inhibitor 3    | A1I3_RAT<br>[4]  | P14046 | 54.5  | 84.5  | 100.5 | 32    | 13.5  | 26    | 0.30 | 1.83E-02 |
| Transthyretin                     | TTHY_RAT         | P02767 | 9.5   | 6.5   | 8.5   | 1.5   | 2.5   | 3     | 0.29 | 4.09E-03 |
| Beta-defensin 50                  | DFB50_RAT        | Q30KJ2 | 5     | 4     | 4.5   | 0     | 1.5   | 0.5   | 0.15 | 1.90E-03 |
| Apolipoprotein A-IV               | APOA4_RAT        | P02651 | 6     | 8.5   | 9     | 0     | 1.5   | 0.5   | 0.09 | 2.22E-03 |

---



## Day 6

| Protein name                                                  | Accession Number | Uniprot ID | C-1-ave | C-2-ave | C-3-ave | D6-1-ave | D6-2-ave | D6-3-ave | Fold change | P-value  |
|---------------------------------------------------------------|------------------|------------|---------|---------|---------|----------|----------|----------|-------------|----------|
| Secernin-2                                                    | SCRN2_RAT        | Q6AYR8     | 0       | 0       | 0       | 6.5      | 12.5     | 10       | #DIV/0!     | 5.14E-03 |
| Fatty acid-binding protein, brain                             | FABP7_RAT        | P55051     | 0       | 0       | 0       | 9.5      | 5.5      | 10       | #DIV/0!     | 4.25E-03 |
| Isopentenyl-diphosphate Delta-isomerase 1                     | IDI1_RAT         | O35760     | 0       | 0       | 0       | 4        | 6        | 6.5      | #DIV/0!     | 1.97E-03 |
| Cystatin-B                                                    | CYTB_RAT         | P01041     | 0       | 0       | 0       | 5.5      | 6.5      | 3.5      | #DIV/0!     | 4.24E-03 |
| Acyl-protein thioesterase 1                                   | LYPA1_RAT        | P70470     | 0       | 0       | 0       | 5.5      | 3.5      | 8        | #DIV/0!     | 1.21E-02 |
| Probable cytosolic iron-sulfur protein assembly protein CIAO1 | CIAO1_RAT        | Q5M7T1     | 0       | 0       | 0       | 4.5      | 6.5      | 2.5      | #DIV/0!     | 1.76E-02 |
| UPF0587 protein C1orf123 homolog                              | CA123_RAT        | Q498R7     | 0       | 0       | 0       | 4.5      | 4.5      | 6        | #DIV/0!     | 5.62E-04 |
| Carbonic anhydrase 1                                          | CAH1_RAT         | B0BNN3     | 0       | 0       | 0       | 2        | 4        | 7.5      | #DIV/0!     | 4.88E-02 |
| 3-mercaptopyruvate sulfurtransferase                          | THTM_RAT         | P97532     | 0       | 0.5     | 0       | 8        | 12.5     | 12       | 65.00       | 1.74E-03 |
| Prostaglandin reductase 2                                     | PTGR2_RAT        | Q5BK81     | 0.5     | 0.5     | 0       | 10       | 10       | 10.5     | 30.50       | 1.97E-06 |
| Chloride intracellular channel protein 4                      | CLIC4_RAT        | Q9Z0W7     | 0       | 0       | 1       | 6.5      | 4.5      | 5.5      | 16.50       | 1.49E-03 |
| ATP synthase subunit beta, mitochondrial                      | ATPB_RAT         | P10719     | 0       | 1       | 0       | 5.5      | 2.5      | 7.5      | 15.50       | 3.16E-02 |
| Retinol-binding protein 1                                     | RET1_RAT         | P02696     | 0       | 1       | 0.5     | 6.5      | 6        | 8.5      | 14.00       | 1.35E-03 |
| Neutrophil gelatinase-associated lipocalin                    | NGAL_RAT         | P30152     | 1.5     | 4       | 4       | 42.5     | 26       | 49.5     | 12.42       | 6.72E-03 |

|                                                                        |                  |        |     |     |     |      |      |      |      |          |
|------------------------------------------------------------------------|------------------|--------|-----|-----|-----|------|------|------|------|----------|
| NKG2-D type II integral<br>membrane protein                            | NKG2D_RAT        | O70215 | 0   | 1.5 | 0   | 4.5  | 5    | 4.5  | 9.33 | 1.38E-03 |
| Ectonucleotide<br>pyrophosphatase/phosphodiesterase<br>family member 3 | ENPP3_RAT        | P97675 | 0   | 0   | 2   | 3    | 7    | 8.5  | 9.25 | 3.61E-02 |
| Aflatoxin B1 aldehyde reductase<br>member 3                            | ARK73_RAT        | P38918 | 0   | 0.5 | 1.5 | 9    | 4.5  | 4    | 8.75 | 3.51E-02 |
| Coatomer subunit beta'                                                 | COPB2_RAT        | O35142 | 0.5 | 0.5 | 1.5 | 4    | 8.5  | 8.5  | 8.40 | 1.60E-02 |
| 14-3-3 protein epsilon                                                 | 1433E_RAT        | P62260 | 0   | 1.5 | 0.5 | 7    | 2.5  | 4.5  | 7.00 | 4.37E-02 |
| Kynurenine/alpha-aminoadipate<br>aminotransferase, mitochondrial       | AADAT_RAT        | Q64602 | 0   | 1   | 1   | 3.5  | 4    | 6    | 6.75 | 1.00E-02 |
| Thioredoxin                                                            | THIO_RAT         | P11232 | 4.5 | 2.5 | 4.5 | 23   | 19   | 32.5 | 6.48 | 6.63E-03 |
| C4b-binding protein alpha chain                                        | C4BPA_RAT        | Q63514 | 1   | 0   | 1   | 2    | 4.5  | 6    | 6.25 | 4.48E-02 |
| Cluster of Glutathione S-<br>transferase omega-1                       | GSTO1_RAT<br>[2] | Q9Z339 | 0.5 | 1   | 1.5 | 5    | 6    | 7.5  | 6.17 | 2.72E-03 |
| Class I histocompatibility antigen,<br>Non-RT1.A alpha-1 chain         | HA11_RAT         | P15978 | 5.5 | 6   | 5   | 26   | 35   | 38   | 6.00 | 1.61E-03 |
| Transforming protein RhoA                                              | RHOA_RAT         | P61589 | 0   | 2   | 0   | 5.5  | 3    | 3.5  | 6.00 | 3.03E-02 |
| Neutrophil collagenase                                                 | MMP8_RAT         | O88766 | 0   | 3   | 0   | 3.5  | 7    | 6.5  | 5.67 | 3.45E-02 |
| Protein disulfide-isomerase A4                                         | PDIA4_RAT        | P38659 | 1   | 1   | 1   | 3.5  | 4    | 6.5  | 4.67 | 1.68E-02 |
| Superoxide dismutase [Cu-Zn]                                           | SODC_RAT         | P07632 | 23  | 10  | 9   | 57.5 | 59   | 77.5 | 4.62 | 2.97E-03 |
| RT1 class I histocompatibility<br>antigen, AA alpha chain              | HA12_RAT         | P16391 | 5.5 | 8   | 4   | 23   | 23.5 | 32   | 4.49 | 2.95E-03 |
| Selenium-binding protein 1                                             | SBP1_RAT         | Q8VIF7 | 0   | 2   | 2.5 | 5    | 7.5  | 7.5  | 4.44 | 1.03E-02 |

|                                                                    |               |        |     |     |      |      |      |      |      |          |
|--------------------------------------------------------------------|---------------|--------|-----|-----|------|------|------|------|------|----------|
| Tumor necrosis factor receptor superfamily member 1B               | TNR1B_RAT     | Q80WY6 | 1   | 1.5 | 1.5  | 6    | 6    | 5.5  | 4.38 | 4.43E-05 |
| 1,2-dihydroxy-3-keto-5-methylthiopentene dioxygenase               | MTND_RAT      | Q562C9 | 3   | 3.5 | 3.5  | 14   | 11   | 16.5 | 4.15 | 2.78E-03 |
| Alpha/beta hydrolase domain-containing protein 14B                 | ABHEB_RAT     | Q6DGG1 | 4   | 7.5 | 6    | 23   | 26   | 22.5 | 4.09 | 2.70E-04 |
| Elongation factor 1-alpha 1                                        | EF1A1_RAT     | P62630 | 1   | 2   | 3.5  | 9.5  | 6.5  | 10.5 | 4.08 | 8.99E-03 |
| Vascular cell adhesion protein 1                                   | VCAM1_RAT     | P29534 | 3.5 | 2.5 | 1.5  | 8    | 12.5 | 10   | 4.07 | 5.75E-03 |
| Moesin                                                             | MOES_RAT      | O35763 | 7.5 | 5   | 6    | 31   | 14   | 24   | 3.73 | 2.79E-02 |
| Complement C4                                                      | CO4_RAT       | P08649 | 4.5 | 7.5 | 14.5 | 32   | 25.5 | 37.5 | 3.58 | 7.46E-03 |
| Pancreatic secretory granule membrane major glycoprotein GP2       | GP2_RAT       | P19218 | 0.5 | 5.5 | 0.5  | 7    | 7.5  | 8.5  | 3.54 | 3.32E-02 |
| Ezrin                                                              | EZRI_RAT      | P31977 | 7   | 8   | 5.5  | 25   | 14.5 | 30   | 3.39 | 2.42E-02 |
| Phospholysine phosphohistidine inorganic pyrophosphate phosphatase | LHPP_RAT      | Q510D5 | 4   | 5.5 | 2.5  | 12.5 | 14   | 13   | 3.29 | 7.04E-04 |
| D-dopachrome decarboxylase                                         | DOPD_RAT      | P80254 | 2   | 3   | 2.5  | 9.5  | 6.5  | 8.5  | 3.27 | 3.64E-03 |
| Na(+)/H(+) exchange regulatory cofactor NHE-RF1                    | NHRF1_RAT     | Q9JJ19 | 8   | 4.5 | 10.5 | 31   | 15   | 25.5 | 3.11 | 3.20E-02 |
| Protein deglycase DJ-1                                             | PARK7_RAT     | O88767 | 5.5 | 3.5 | 5    | 11   | 8.5  | 15   | 2.46 | 2.63E-02 |
| Collectin-12                                                       | COL12_RAT     | Q4V885 | 3.5 | 0.5 | 1.5  | 4.5  | 4.5  | 4.5  | 2.45 | 3.90E-02 |
| Na(+)/H(+) exchange regulatory cofactor NHE-RF3                    | NHRF3_RAT     | Q9JJ40 | 16  | 8.5 | 15.5 | 38.5 | 21   | 33.5 | 2.33 | 3.70E-02 |
| Cluster of Actin, cytoplasmic 1                                    | ACTB_RAT [4]  | P60711 | 11  | 18  | 22   | 35   | 36.5 | 42.5 | 2.24 | 6.01E-03 |
| Cluster of 14-3-3 protein zeta/delta                               | 1433Z_RAT [5] | P63102 | 5   | 5   | 7.5  | 16.5 | 9    | 12.5 | 2.17 | 4.22E-02 |

|                                                      |               |        |       |       |      |       |       |       |      |          |
|------------------------------------------------------|---------------|--------|-------|-------|------|-------|-------|-------|------|----------|
| Galectin-3-binding protein                           | LG3BP_RAT     | O70513 | 14    | 11.5  | 13   | 25    | 30    | 21    | 1.97 | 9.85E-03 |
| Alpha-1-acid glycoprotein                            | A1AG_RAT      | P02764 | 14    | 13    | 22   | 34    | 29.5  | 32    | 1.95 | 7.76E-03 |
| Galectin-5                                           | LEG5_RAT      | P47967 | 10    | 8     | 8.5  | 14    | 15    | 22.5  | 1.94 | 3.87E-02 |
| Intercellular adhesion molecule 1                    | ICAM1_RAT     | Q00238 | 6.5   | 4.5   | 5.5  | 9     | 13.5  | 9     | 1.91 | 3.58E-02 |
| Neprilysin                                           | NEP_RAT       | P07861 | 13    | 12.5  | 16   | 31.5  | 18.5  | 28    | 1.88 | 3.93E-02 |
| Uromodulin                                           | UROM_RAT      | P27590 | 83    | 56.5  | 81   | 113.5 | 135   | 138.5 | 1.76 | 8.65E-03 |
| Complement factor D                                  | CFAD_RAT      | P32038 | 26.5  | 20    | 24.5 | 16.5  | 11.5  | 18    | 0.65 | 3.87E-02 |
| Calbindin                                            | CALB1_RAT     | P07171 | 11    | 10.5  | 12.5 | 6     | 7.5   | 8.5   | 0.65 | 1.32E-02 |
| Clusterin                                            | CLUS_RAT      | P05371 | 16    | 18.5  | 17.5 | 13    | 8.5   | 11.5  | 0.63 | 1.37E-02 |
| Serum albumin                                        | ALBU_RAT      | P02770 | 257   | 278.5 | 308  | 194.5 | 158.5 | 173   | 0.62 | 4.27E-03 |
| CD320 antigen                                        | CD320_RAT     | Q5HZW5 | 5     | 4.5   | 3.5  | 2     | 3     | 3     | 0.62 | 3.94E-02 |
| Matrix-remodeling-associated protein 8               | MXRA8_RAT     | Q5XI43 | 29    | 29.5  | 20.5 | 13.5  | 20    | 13    | 0.59 | 4.25E-02 |
| Lysosomal acid phosphatase                           | PPAL_RAT      | P20611 | 14.5  | 12    | 16   | 8.5   | 9.5   | 5.5   | 0.55 | 1.94E-02 |
| Gamma-interferon-inducible lysosomal thiol reductase | GILT_RAT      | Q499T2 | 18    | 13.5  | 18.5 | 9.5   | 9.5   | 8     | 0.54 | 1.00E-02 |
| Osteopontin                                          | OSTP_RAT      | P08721 | 9.5   | 8     | 9.5  | 3     | 4     | 7.5   | 0.54 | 4.56E-02 |
| Lysosomal alpha-glucosidase                          | LYAG_RAT      | Q6P7A9 | 14    | 21    | 18   | 8     | 11.5  | 8     | 0.52 | 2.21E-02 |
| Cluster of Carboxylesterase 1C                       | EST1C_RAT [4] | P10959 | 14    | 14    | 16.5 | 4.5   | 9.5   | 8     | 0.49 | 1.16E-02 |
| Serine protease inhibitor A3L                        | SPA3L_RAT     | P05544 | 159.5 | 145.5 | 116  | 45.5  | 92.5  | 51.5  | 0.45 | 1.69E-02 |
| Glutathione peroxidase 3                             | GPX3_RAT      | P23764 | 6.5   | 6     | 5.5  | 3     | 3.5   | 1.5   | 0.44 | 7.49E-03 |
| Beta-2-glycoprotein 1                                | APOH_RAT      | P26644 | 14.5  | 10    | 13   | 4.5   | 7.5   | 4.5   | 0.44 | 1.35E-02 |
| Probasin                                             | PBAS_RAT      | P15399 | 14.5  | 14    | 17.5 | 2.5   | 6     | 11.5  | 0.43 | 3.79E-02 |
| Nucleobindin-1                                       | NUCB1_RAT     | Q63083 | 17    | 18    | 14   | 9     | 6     | 4     | 0.39 | 6.07E-03 |
| Apolipoprotein E                                     | APOE_RAT      | P02650 | 18    | 17.5  | 20.5 | 9     | 4     | 8     | 0.38 | 2.85E-03 |

|                                  |              |        |      |       |       |      |      |      |      |          |
|----------------------------------|--------------|--------|------|-------|-------|------|------|------|------|----------|
| Attractin                        | ATRN_RAT     | Q99J86 | 10.5 | 14    | 13    | 6    | 6.5  | 1.5  | 0.37 | 1.46E-02 |
| Fetuin-B                         | FETUB_RAT    | Q9QX79 | 20   | 21.5  | 18    | 7    | 6.5  | 8.5  | 0.37 | 4.47E-04 |
| Vitamin D-binding protein        | VTDB_RAT     | P04276 | 42   | 42.5  | 51    | 19.5 | 19.5 | 11   | 0.37 | 2.19E-03 |
| Lysosomal thioesterase PPT2      | PPT2_RAT     | O70489 | 5.5  | 6.5   | 5     | 0.5  | 4    | 1.5  | 0.35 | 3.16E-02 |
| Growth arrest-specific protein 6 | GAS6_RAT     | Q63772 | 6.5  | 7.5   | 6     | 1    | 4.5  | 1.5  | 0.35 | 2.13E-02 |
| Dipeptidyl peptidase 1           | CATC_RAT     | P80067 | 12.5 | 15    | 8.5   | 3    | 6.5  | 2    | 0.32 | 2.49E-02 |
| Transthyretin                    | TTHY_RAT     | P02767 | 9.5  | 6.5   | 8.5   | 2    | 3.5  | 2    | 0.31 | 5.03E-03 |
| C-reactive protein               | CRP_RAT      | P48199 | 6.5  | 9.5   | 6     | 0.5  | 3.5  | 2.5  | 0.30 | 2.12E-02 |
| Retinol-binding protein 4        | RET4_RAT     | P04916 | 5.5  | 3.5   | 5     | 1.5  | 1    | 1.5  | 0.29 | 5.90E-03 |
| Putative phospholipase B-like 2  | PLBL2_RAT    | Q4QQW8 | 6    | 9     | 4.5   | 1.5  | 3.5  | 0.5  | 0.28 | 4.26E-02 |
| Beta-microseminoprotein          | MSMB_RAT     | P97580 | 7.5  | 10    | 8.5   | 0.5  | 4    | 2.5  | 0.27 | 7.09E-03 |
| Urinary protein 2                | UP2_RAT      | P81828 | 132  | 104.5 | 105   | 33.5 | 20   | 26.5 | 0.23 | 9.13E-04 |
| Aggrecan core protein            | PGCA_RAT     | P07897 | 14.5 | 14    | 10.5  | 3.5  | 2.5  | 3    | 0.23 | 1.50E-03 |
| Cluster of Alpha-1-inhibitor 3   | A1I3_RAT [4] | P14046 | 54.5 | 84.5  | 100.5 | 13.5 | 31.5 | 8.5  | 0.22 | 1.51E-02 |
| Follistatin-related protein 1    | FSTL1_RAT    | Q62632 | 8    | 8     | 8.5   | 0.5  | 4    | 0.5  | 0.20 | 5.27E-03 |
| Complement factor I              | CFAI_RAT     | Q9WUW3 | 4    | 4.5   | 7     | 3    | 0    | 0    | 0.19 | 3.79E-02 |
| Urinary protein 3                | UP3_RAT      | P83121 | 98.5 | 89    | 89    | 19.5 | 5.5  | 17.5 | 0.15 | 1.33E-04 |
| Beta-defensin 50                 | DFB50_RAT    | Q30KJ2 | 5    | 4     | 4.5   | 0    | 1    | 0.5  | 0.11 | 6.08E-04 |
| Activin receptor type-1B         | ACV1B_RAT    | P80202 | 6    | 4     | 3     | 0    | 0    | 0    | 0.00 | 7.97E-03 |
| Apolipoprotein A-IV              | APOA4_RAT    | P02651 | 6    | 8.5   | 9     | 0    | 0    | 0    | 0.00 | 1.08E-03 |

## Day 9

| Protein name                                                | Accession Number | Uniprot ID | C-1-ave | C-2-ave | C-3-ave | D9-1-ave | D9-2-ave | D9-3-ave | Fold change | P-value  |
|-------------------------------------------------------------|------------------|------------|---------|---------|---------|----------|----------|----------|-------------|----------|
| Ig gamma-2B chain C region                                  | IGG2B_RAT        | P20761     | 0       | 1.5     | 1       | 15       | 18       | 12       | 18.00       | 1.37E-03 |
| Acidic mammalian chitinase                                  | CHIA_RAT         | Q6RY07     | 0.5     | 1       | 0       | 7        | 7        | 9.5      | 15.67       | 1.14E-03 |
| Neutrophil gelatinase-associated lipocalin                  | NGAL_RAT         | P30152     | 1.5     | 4       | 4       | 35       | 45       | 32.5     | 11.84       | 9.26E-04 |
| Cluster of Keratin, type II cytoskeletal 8                  | K2C8_RAT [2]     | Q10758     | 0       | 1.5     | 0       | 5        | 4        | 8.5      | 11.67       | 2.14E-02 |
| NKG2-D type II integral membrane protein                    | NKG2D_RAT        | O70215     | 0       | 1.5     | 0       | 4.5      | 4        | 5.5      | 9.33        | 3.34E-03 |
| Class I histocompatibility antigen, Non-RT1.A alpha-1 chain | HA11_RAT         | P15978     | 5.5     | 6       | 5       | 30       | 36       | 52.5     | 7.18        | 7.23E-03 |
| Transforming protein RhoA                                   | RHOA_RAT         | P61589     | 0       | 2       | 0       | 4        | 3        | 5        | 6.00        | 1.94E-02 |
| RT1 class I histocompatibility antigen, AA alpha chain      | HA12_RAT         | P16391     | 5.5     | 8       | 4       | 23.5     | 28       | 38       | 5.11        | 5.68E-03 |
| Na(+)/H(+) exchange regulatory cofactor NHE-RF1             | NHRF1_RAT        | Q9JJ19     | 8       | 4.5     | 10.5    | 35.5     | 41.5     | 36       | 4.91        | 3.19E-04 |
| Brain acid soluble protein 1                                | BASP1_RAT        | Q05175     | 2.5     | 0.5     | 1.5     | 6        | 7.5      | 6.5      | 4.44        | 2.07E-03 |
| Tumor necrosis factor receptor superfamily member 1B        | TNR1B_RAT        | Q80WY6     | 1       | 1.5     | 1.5     | 6        | 6        | 5        | 4.25        | 3.13E-04 |
| Moesin                                                      | MOES_RAT         | O35763     | 7.5     | 5       | 6       | 20       | 29       | 29.5     | 4.24        | 3.23E-03 |
| Ezrin                                                       | EZRI_RAT         | P31977     | 7       | 8       | 5.5     | 20       | 27.5     | 33.5     | 3.95        | 7.10E-03 |

|                                                 |               |        |       |       |      |      |      |      |      |          |
|-------------------------------------------------|---------------|--------|-------|-------|------|------|------|------|------|----------|
| Alpha-1-acid glycoprotein                       | A1AG_RAT      | P02764 | 14    | 13    | 22   | 48   | 66.5 | 68   | 3.72 | 3.19E-03 |
| Chloride intracellular channel protein 1        | CLIC1_RAT     | Q6MG61 | 2     | 0     | 1.5  | 2.5  | 5.5  | 5    | 3.71 | 4.57E-02 |
| Vascular cell adhesion protein 1                | VCAM1_RAT     | P29534 | 3.5   | 2.5   | 1.5  | 6.5  | 8    | 10.5 | 3.33 | 1.10E-02 |
| Cluster of Ig gamma-2A chain C region           | IGG2A_RAT [2] | P20760 | 13    | 15    | 8.5  | 44   | 43.5 | 34   | 3.33 | 1.69E-03 |
| Peptidyl-prolyl cis-trans isomerase A           | PPIA_RAT      | P10111 | 2.5   | 3.5   | 2.5  | 6    | 8    | 12   | 3.06 | 3.14E-02 |
| Na(+)/H(+) exchange regulatory cofactor NHE-RF3 | NHRF3_RAT     | Q9JJ40 | 16    | 8.5   | 15.5 | 29.5 | 41.5 | 39.5 | 2.76 | 6.08E-03 |
| Cluster of Putative lysozyme C-2                | LYSC2_RAT [2] | Q05820 | 2.5   | 1     | 3    | 8    | 5    | 4.5  | 2.69 | 4.24E-02 |
| Beta-2-microglobulin                            | B2MG_RAT      | P07151 | 13.5  | 6.5   | 6    | 19.5 | 24   | 24   | 2.60 | 8.30E-03 |
| Ig kappa chain C region, B allele               | KACB_RAT      | P01835 | 100.5 | 156.5 | 86.5 | 356  | 247  | 285  | 2.59 | 9.16E-03 |
| Superoxide dismutase [Cu-Zn]                    | SODC_RAT      | P07632 | 23    | 10    | 9    | 25   | 40   | 38.5 | 2.46 | 3.54E-02 |
| Protein RoBo-1                                  | ROB1_RAT      | O55006 | 5.5   | 4.5   | 4.5  | 11.5 | 11   | 11   | 2.31 | 7.03E-05 |
| Ribonuclease 4                                  | RNAS4_RAT     | O55004 | 7     | 3.5   | 4    | 13.5 | 8.5  | 11   | 2.28 | 2.71E-02 |
| Cathepsin S                                     | CATS_RAT      | Q02765 | 4     | 3.5   | 2.5  | 7    | 7    | 8.5  | 2.25 | 3.34E-03 |
| Cluster of Keratin, type II cytoskeletal 1      | K2C1_RAT [3]  | Q6IMF3 | 2.5   | 8     | 5    | 13   | 10   | 10.5 | 2.16 | 3.11E-02 |
| Ig kappa chain C region, A allele               | KACA_RAT      | P01836 | 112.5 | 100.5 | 74   | 183  | 202  | 226  | 2.13 | 3.05E-03 |
| Gamma-glutamyltranspeptidase 1                  | GGT1_RAT      | P07314 | 16.5  | 13    | 16.5 | 29.5 | 28.5 | 34.5 | 2.01 | 2.11E-03 |

|                                                 |               |        |      |       |       |      |      |      |      |          |
|-------------------------------------------------|---------------|--------|------|-------|-------|------|------|------|------|----------|
| Ribonuclease UK114                              | UK114_RAT     | P52759 | 4    | 2.5   | 2     | 5.5  | 6.5  | 4.5  | 1.94 | 3.29E-02 |
| Nepriylsin                                      | NEP_RAT       | P07861 | 13   | 12.5  | 16    | 26.5 | 26   | 27.5 | 1.93 | 4.04E-04 |
| Intercellular adhesion molecule<br>1            | ICAM1_RAT     | Q00238 | 6.5  | 4.5   | 5.5   | 7.5  | 13   | 10.5 | 1.88 | 4.60E-02 |
| Cluster of 14-3-3 protein<br>zeta/delta         | 1433Z_RAT [5] | P63102 | 5    | 5     | 7.5   | 10   | 10.5 | 12   | 1.86 | 8.24E-03 |
| Galectin-3-binding protein                      | LG3BP_RAT     | O70513 | 14   | 11.5  | 13    | 24   | 27.5 | 20   | 1.86 | 8.56E-03 |
| Ig lambda-2 chain C region                      | LAC2_RAT      | P20767 | 26   | 28    | 31    | 52.5 | 57   | 45.5 | 1.82 | 3.07E-03 |
| Polymeric immunoglobulin<br>receptor            | PIGR_RAT      | P15083 | 28.5 | 31.5  | 32    | 46   | 55.5 | 63   | 1.79 | 8.67E-03 |
| Protein deglycase DJ-1                          | PARK7_RAT     | O88767 | 5.5  | 3.5   | 5     | 9.5  | 8.5  | 7    | 1.79 | 1.77E-02 |
| Cluster of Heat shock cognate<br>71 kDa protein | HSP7C_RAT [4] | P63018 | 14   | 11.5  | 11.5  | 24.5 | 16.5 | 21.5 | 1.69 | 2.65E-02 |
| Granulins                                       | GRN_RAT       | P23785 | 13.5 | 13.5  | 16    | 20.5 | 22   | 27   | 1.62 | 1.44E-02 |
| Sialate O-acetylsterase                         | SIAE_RAT      | P82450 | 7    | 7.5   | 4     | 9.5  | 9    | 9.5  | 1.51 | 4.57E-02 |
| Serum albumin                                   | ALBU_RAT      | P02770 | 257  | 278.5 | 308   | 183  | 216  | 141  | 0.64 | 1.83E-02 |
| Matrix-remodeling-associated<br>protein 8       | MXRA8_RAT     | Q5XI43 | 29   | 29.5  | 20.5  | 16.5 | 18.5 | 14.5 | 0.63 | 3.51E-02 |
| Attractin                                       | ATRN_RAT      | Q99J86 | 10.5 | 14    | 13    | 9.5  | 7.5  | 6    | 0.61 | 2.92E-02 |
| Neogenin (Fragment)                             | NEO1_RAT      | P97603 | 4.5  | 5.5   | 5     | 3    | 3    | 3    | 0.60 | 2.28E-03 |
| Pro-epidermal growth factor                     | EGF_RAT       | P07522 | 128  | 149.5 | 144.5 | 75.5 | 78.5 | 94   | 0.59 | 2.59E-03 |
| Protein FAM151A                                 | F151A_RAT     | Q642A7 | 6.5  | 7.5   | 6.5   | 2.5  | 5    | 4.5  | 0.59 | 2.73E-02 |
| Transthyretin                                   | TTHY_RAT      | P02767 | 9.5  | 6.5   | 8.5   | 3    | 5.5  | 5.5  | 0.57 | 4.48E-02 |
| Apolipoprotein E                                | APOE_RAT      | P02650 | 18   | 17.5  | 20.5  | 8.5  | 12   | 10   | 0.54 | 3.47E-03 |
| Alpha-1-macroglobulin                           | A1M_RAT       | Q63041 | 97   | 124.5 | 130.5 | 76.5 | 60   | 49.5 | 0.53 | 1.30E-02 |



|                                                       |           |        |       |       |      |      |      |      |      |          |
|-------------------------------------------------------|-----------|--------|-------|-------|------|------|------|------|------|----------|
| Deoxyribonuclease-1                                   | DNAS1_RAT | P21704 | 28    | 41    | 28.5 | 21.5 | 14.5 | 15.5 | 0.53 | 3.27E-02 |
| Urinary protein 2                                     | UP2_RAT   | P81828 | 132   | 104.5 | 105  | 48   | 60.5 | 68.5 | 0.52 | 7.25E-03 |
| Nidogen-1 (Fragment)                                  | NID1_RAT  | P08460 | 11.5  | 12    | 10.5 | 4.5  | 7    | 6    | 0.51 | 2.94E-03 |
| Dipeptidyl peptidase 2                                | DPP2_RAT  | Q9EPB1 | 11.5  | 13    | 17.5 | 8    | 6    | 7    | 0.50 | 2.09E-02 |
| Lysosomal alpha-glucosidase                           | LYAG_RAT  | Q6P7A9 | 14    | 21    | 18   | 9    | 9    | 7.5  | 0.48 | 1.18E-02 |
| Serine protease inhibitor A3L                         | SPA3L_RAT | P05544 | 159.5 | 145.5 | 116  | 41   | 63.5 | 85.5 | 0.45 | 1.32E-02 |
| Growth arrest-specific protein 6                      | GAS6_RAT  | Q63772 | 6.5   | 7.5   | 6    | 2.5  | 3    | 3.5  | 0.45 | 2.24E-03 |
| Nucleobindin-1                                        | NUCB1_RAT | Q63083 | 17    | 18    | 14   | 2.5  | 11   | 8.5  | 0.45 | 3.22E-02 |
| Urinary protein 3                                     | UP3_RAT   | P83121 | 98.5  | 89    | 89   | 33   | 37.5 | 51.5 | 0.44 | 1.30E-03 |
| Vitamin D-binding protein                             | VTDB_RAT  | P04276 | 42    | 42.5  | 51   | 18.5 | 28.5 | 11   | 0.43 | 1.15E-02 |
| Aggrecan core protein                                 | PGCA_RAT  | P07897 | 14.5  | 14    | 10.5 | 3    | 6    | 7.5  | 0.42 | 1.48E-02 |
| Beta-2-glycoprotein 1                                 | APOH_RAT  | P26644 | 14.5  | 10    | 13   | 4.5  | 8.5  | 2.5  | 0.41 | 2.92E-02 |
| Fetuin-B                                              | FETUB_RAT | Q9QX79 | 20    | 21.5  | 18   | 5.5  | 9    | 10   | 0.41 | 2.36E-03 |
| Vomeromodulin (Fragment)                              | VOME_RAT  | Q63751 | 10.5  | 10.5  | 7    | 3.5  | 5    | 2.5  | 0.39 | 1.46E-02 |
| Cubilin                                               | CUBN_RAT  | O70244 | 27.5  | 45.5  | 29.5 | 20   | 9.5  | 10   | 0.39 | 3.42E-02 |
| Procollagen C-endopeptidase<br>enhancer 1             | PCOC1_RAT | O08628 | 3     | 5     | 5    | 2.5  | 2    | 0.5  | 0.38 | 4.11E-02 |
| Anthrax toxin receptor 1                              | ANTR1_RAT | Q0PMD2 | 5     | 5     | 4.5  | 1.5  | 2.5  | 1.5  | 0.38 | 1.29E-03 |
| Sulfhydryl oxidase 1                                  | QSOX1_RAT | Q6IUU3 | 13.5  | 19.5  | 14.5 | 7    | 6.5  | 4.5  | 0.38 | 8.05E-03 |
| Biotinidase                                           | BTD_RAT   | Q5FVF9 | 12.5  | 13.5  | 12.5 | 5.5  | 4    | 5    | 0.38 | 1.33E-04 |
| Low-density lipoprotein<br>receptor-related protein 2 | LRP2_RAT  | P98158 | 118   | 158.5 | 158  | 94.5 | 43   | 25.5 | 0.38 | 2.14E-02 |
| Calbindin                                             | CALB1_RAT | P07171 | 11    | 10.5  | 12.5 | 2.5  | 7.5  | 2    | 0.35 | 1.68E-02 |
| Retinol-binding protein 4                             | RET4_RAT  | P04916 | 5.5   | 3.5   | 5    | 1.5  | 1    | 2    | 0.32 | 8.97E-03 |
| C-reactive protein                                    | CRP_RAT   | P48199 | 6.5   | 9.5   | 6    | 1.5  | 3    | 2    | 0.30 | 1.18E-02 |

|                                               |               |        |      |      |       |     |      |     |      |          |
|-----------------------------------------------|---------------|--------|------|------|-------|-----|------|-----|------|----------|
| Dipeptidyl peptidase 1                        | CATC_RAT      | P80067 | 12.5 | 15   | 8.5   | 4.5 | 4    | 2   | 0.29 | 1.41E-02 |
| Cluster of Carboxylesterase 1C                | EST1C_RAT [4] | P10959 | 14   | 14   | 16.5  | 4   | 5    | 3   | 0.27 | 4.34E-04 |
| Follistatin-related protein 1                 | FSTL1_RAT     | Q62632 | 8    | 8    | 8.5   | 1   | 3    | 2   | 0.24 | 5.08E-04 |
| Multiple inositol polyphosphate phosphatase 1 | MINP1_RAT     | O35217 | 10.5 | 12.5 | 11.5  | 4   | 1.5  | 2.5 | 0.23 | 6.80E-04 |
| Serine protease inhibitor A3M (Fragment)      | SPA3M_RAT     | Q63556 | 17   | 7    | 13.5  | 2   | 4.5  | 1.5 | 0.21 | 3.29E-02 |
| Beta-defensin 50                              | DFB50_RAT     | Q30KJ2 | 5    | 4    | 4.5   | 0   | 1    | 1.5 | 0.19 | 2.24E-03 |
| Cluster of Alpha-1-inhibitor 3                | A1I3_RAT [4]  | P14046 | 54.5 | 84.5 | 100.5 | 16  | 16.5 | 3   | 0.15 | 8.69E-03 |
| Sialidase-1                                   | NEUR1_RAT     | Q99PW3 | 7    | 8    | 6.5   | 0.5 | 1.5  | 1   | 0.14 | 3.05E-04 |
| Apolipoprotein A-IV                           | APOA4_RAT     | P02651 | 6    | 8.5  | 9     | 0   | 2    | 1   | 0.13 | 3.34E-03 |

**Supplementary Table S6.** Differential proteins identified in different stages in 7 Walker-256 tail-vein injection rats.

| Time points | Common identified                                                                                                                                             | Triple TOF 5600™                                                                                                                                                                                                                                                                                                                                                                                        | Orbitrap Fusion Lumos                                                                                                                                                                                                                                                                                                                                                              |
|-------------|---------------------------------------------------------------------------------------------------------------------------------------------------------------|---------------------------------------------------------------------------------------------------------------------------------------------------------------------------------------------------------------------------------------------------------------------------------------------------------------------------------------------------------------------------------------------------------|------------------------------------------------------------------------------------------------------------------------------------------------------------------------------------------------------------------------------------------------------------------------------------------------------------------------------------------------------------------------------------|
| <b>D2</b>   | APOE_RAT, LG3BP_RAT, EGF_RAT, NID2_RAT, A1M_RAT, ABHEB_RAT, UP3_RAT                                                                                           | MTND_RAT, IC1_RAT, PIGR_RAT, AMPN_RAT, PRDX6_RAT, HSP7C_RAT, CK054_RAT, MXRA8_RAT, IF6_RAT, CO4_RAT, ANTR1_RAT, GSTO1_RAT, UP2_RAT, EZRI_RAT, ACY1A_RAT, DPP4_RAT, LEG5_RAT, KLK1_RAT, PIP_RAT                                                                                                                                                                                                          | ACV1B_RAT, NHRF1_RAT, NEO1_RAT, NID1_RAT, GELS_RAT, CATC_RAT, PCOC1_RAT, FETUB_RAT, EST1C_RAT[4], ANGT_RAT, ALBU_RAT, ATRN_RAT, GAS6_RAT, VTDB_RAT, APOA4_RAT, PPT2_RAT, NGAL_RAT, THIO_RAT, HA12_RAT, KACA_RAT, UROM_RAT, RET4_RAT, GP2_RAT, HA11_RAT, BTD_RAT, NEUR1_RAT, ENOA_RAT, LEG9_RAT, PPIA_RAT, SPA3L_RAT, RHOA_RAT, MINP1_RAT, NTF2_RAT, BASP1_RAT, GGT1_RAT, PDIA1_RAT |
| <b>D4</b>   | FETUB_RAT, ALBU_RAT, NGAL_RAT, BTD_RAT, A1AG_RAT, PIGR_RAT, CATC_RAT, LG3BP_RAT, VTDB_RAT, HA12_RAT, CO4_RAT, A1M_RAT, SPA3L_RAT, GGT1_RAT, UP3_RAT, ROB1_RAT | SLC31_RAT, AMPN_RAT, HSP7C_RAT, MOES_RAT, NHRF3_RAT, MXRA8_RAT, EGF_RAT, ALDOB_RAT, TRFE_RAT, ABHEB_RAT, ICAM1_RAT, SPA3K_RAT, GSTO1_RAT, ACY1A_RAT, KLK1_RAT, LEG5_RAT, PIP_RAT, MTND_RAT, CALB1_RAT, IC1_RAT, CLIC1_RAT, GSH1_RAT, EF1A1_RAT, KLK7_RAT, CD14_RAT, PRVA_RAT, UROM_RAT, VDACL1_RAT, FETUA_RAT, AMPE_RAT, F16P1_RAT, CFAD_RAT, EST1C_RAT, EZRI_RAT, CRP_RAT, DPP4_RAT, GGH_RAT, ACTG_RAT | NKG2D_RAT, GDIR1_RAT, EST1C_RAT[4], TTHY_RAT, DFB50_RAT, GAS6_RAT, APOA4_RAT, THIO_RAT, RET4_RAT, ACY3_RAT, UP2_RAT, APOH_RAT, A1I3_RAT[4], ATRN_RAT, PPT2_RAT, GPC5C_RAT, HA11_RAT, NEP_RAT                                                                                                                                                                                       |

**D6**

MOES\_RAT,MXRA8\_RAT,FETU  
B\_RAT,ABHEB\_RAT,ICAM1\_R  
AT,A1AG\_RAT,LEG5\_RAT,MTN  
D\_RAT,CALB1\_RAT,APOE\_RA  
T,CATC\_RAT,LG3BP\_RAT,VTD  
B\_RAT,HA12\_RAT,UROM\_RAT,  
HA11\_RAT,CO4\_RAT,SODC\_RA  
T,CFAD\_RAT,SPA3L\_RAT,EZRI  
\_RAT,UP3\_RAT

THRB\_RAT,HSP7C\_RAT,CDHR5\_RAT,EGF  
\_RAT,BTD\_RAT,6PGL\_RAT,SPA3K\_RAT,A  
CY1A\_RAT,KLK1\_RAT,PIP\_RAT,IC1\_RAT,  
CLIC1\_RAT,PIGR\_RAT,MUG1\_RAT,CD14\_  
RAT,A1I3\_RAT,IF6\_RAT,K2C1\_RAT,VDAC  
1\_RAT,F16P1\_RAT,A1M\_RAT,MEP1A\_RA  
T,EST1C\_RAT,DPP4\_RAT,GGH\_RAT,ACT  
G\_RAT,ROB1\_RAT

ACV1B\_RAT,LHPP\_RAT,1433Z\_RAT[5],CAH1\_RAT,  
CFAI\_RAT,NKG2D\_RAT,NUCB1\_RAT,THTM\_RAT,  
PLBL2\_RAT,NHRF3\_RAT,SBP1\_RAT,CLIC4\_RAT,G  
PX3\_RAT,EST1C\_RAT[4],FABP7\_RAT,TTHY\_RAT,  
ALBU\_RAT,DFB50\_RAT,GAS6\_RAT,PPAL\_RAT,AP  
OA4\_RAT,NGAL\_RAT,THIO\_RAT,RET4\_RAT,GP2\_  
RAT,PGCA\_RAT,CD320\_RAT,PTGR2\_RAT,TNR1B\_  
RAT,MMP8\_RAT,LYP1A1\_RAT,CLUS\_RAT,VCAM1\_  
RAT,RET1\_RAT,ATPB\_RAT,UP2\_RAT,ACTB\_RAT  
[4],GSTO1\_RAT[2],APOH\_RAT,AADAT\_RAT,NHRF  
1\_RAT,COL12\_RAT,GILT\_RAT,FSTL1\_RAT,ENPP3\_  
RAT,OSTP\_RAT,EF1A1\_RAT,DOPD\_RAT,CIAO1\_R  
AT,MSMB\_RAT,SCRN2\_RAT,CYTB\_RAT,A1I3\_RAT  
[4],ATRN\_RAT,COPB2\_RAT,PARK7\_RAT,PPT2\_RA  
T,LYAG\_RAT,C4BPA\_RAT,1433E\_RAT,ARK73\_RAT  
,CA123\_RAT,RHOA\_RAT,CRP\_RAT,NEP\_RAT,IDI1\_  
RAT,PBAS\_RAT,PDIA4\_RAT

**D9**

CATS\_RAT,MOES\_RAT,NHRF3  
\_RAT,MXRA8\_RAT,FETUB\_RA  
T,EGF\_RAT,ALBU\_RAT,APOA4  
\_RAT,NGAL\_RAT,SIAE\_RAT,B  
TD\_RAT,ICAM1\_RAT,A1AG\_R  
AT,NHRF1\_RAT,CALB1\_RAT,L  
AC2\_RAT,IGG2B\_RAT,CLIC1\_R  
AT,APOE\_RAT,PIGR\_RAT,LG3B  
P\_RAT,LRP2\_RAT,PARK7\_RAT,  
HA12\_RAT,LYAG\_RAT,SODC\_  
RAT,A1M\_RAT,SPA3L\_RAT,EZ  
RI\_RAT,CRP\_RAT,GGT1\_RAT,U  
P3\_RAT,ROB1\_RAT,KACB\_RAT

SLC31\_RAT,THRB\_RAT,CATL1\_RAT,AMP  
N\_RAT,PRDX6\_RAT,HSP7C\_RAT,PEBP1\_R  
AT,CK054\_RAT,CDHR5\_RAT,PLBL2\_RAT,  
FABP7\_RAT,IGG2A\_RAT,CD48\_RAT,CTL4  
\_RAT,ABHEB\_RAT,SPA3K\_RAT,ACY1A\_R  
AT,CBG\_RAT,KLK1\_RAT,PIP\_RAT,MTND  
\_RAT,IC1\_RAT,GSH1\_RAT,MUG1\_RAT,K  
VX01\_RAT,CAH3\_RAT,KLK7\_RAT,FINC\_  
RAT,CD14\_RAT,A1I3\_RAT,PRVA\_RAT,IF6  
\_RAT,K2C1\_RAT,VDAC1\_RAT,FETUA\_RA  
T,F16P1\_RAT,CO4\_RAT,MEP1A\_RAT,EST1  
C\_RAT,IDI1\_RAT,NTF2\_RAT,DPP4\_RAT,G  
GH\_RAT,ACTG\_RAT

NID1\_RAT,NEO1\_RAT,HSP7C\_RAT  
[4],1433Z\_RAT[5],QSOX1\_RAT,B2MG\_RAT,DPP2\_R  
AT,NKG2D\_RAT,F151A\_RAT,NUCB1\_RAT,K2C8\_R  
AT[2],VOME\_RAT,EST1C\_RAT[4],TTHY\_RAT,DFB5  
0\_RAT,GAS6\_RAT,RET4\_RAT,PGCA\_RAT,TNR1B\_  
RAT,NEUR1\_RAT,VCAM1\_RAT,PPIA\_RAT,ANTR1\_  
RAT,MINP1\_RAT,UP2\_RAT,APOH\_RAT,GRN\_RAT,  
FSTL1\_RAT,DNAS1\_RAT,CATC\_RAT,A1I3\_RAT[4],  
CHIA\_RAT,K2C1\_RAT[3],PCOC1\_RAT,RNAS4\_RAT  
,CUBN\_RAT,SPA3M\_RAT,ATRN\_RAT,VTDB\_RAT,  
LYSC2\_RAT[2],KACA\_RAT,HA11\_RAT,UK114\_RAT  
,IGG2A\_RAT[2],RHOA\_RAT,NEP\_RAT,BASP1\_RAT

---

**Supplementary Table S7.** Twenty differential proteins enriched in biological process associated with immune system.

| <b>Biological process</b>                       | <b>Uniprot ID</b> | <b>Gene</b> |
|-------------------------------------------------|-------------------|-------------|
|                                                 | IGG2B_RAT         | Igh-1a      |
|                                                 | IC1_RAT           | Serping1    |
|                                                 | CFAI_RAT          | Cfi         |
|                                                 | CO4_RAT           | C4          |
|                                                 | IGG2A_RAT         | Igg-2a      |
| <b>regulation of immune system process</b>      | SIAE_RAT          | Siae        |
| <b>complement activation, classical pathway</b> | A1AG_RAT          | Orm1        |
| <b>ERK1 and ERK2 cascade</b>                    | GGT1_RAT          | Ggt1        |
| <b>innate immune response</b>                   | PIP_RAT           | Pip         |
| <b>positive regulation of B cell activation</b> | CRP_RAT           | Crp         |
| <b>B cell receptor signaling pathway</b>        | CO9_RAT           | C9          |
|                                                 | APOA1_RAT         | Apoa1       |
|                                                 | TRFE_RAT          | Tf          |
|                                                 | LEG9_RAT          | Lgals9      |
|                                                 | ANGT_RAT          | Agt         |
|                                                 | EGF_RAT           | Egf         |
|                                                 | NGAL_RAT          | Lcn2        |
|                                                 | B2MG_RAT          | B2m         |
|                                                 | NKG2D_RAT         | Klrk1       |
|                                                 | CD14_RAT          | Cd14        |
